# Supplementary material for: How do perfluorinated alkanoic acids elicit cytochrome P450 to catalyze methane hydroxylation? An MD and QM/MM study
Source: Royal Society of Chemistry journal article supplement (doi:10.1039/c2ra22294a), 2012-12-12
Supplement: c2ra22294a.pdf [file c2ra22294a.pdf]

# Electronic Supporting Information

## **How Do Perfluorinated Alkanoic Acids Elicit Cytochrome P450 to Catalyze Methane Hydroxylation? An MD and QM/MM Study**

*Chunsen Li and Sason Shaik\**

*Institute of Chemistry and the Lise-Meitner-Minerva Center for Computational  
Quantum Chemistry, The Hebrew University of Jerusalem, 91904 Jerusalem, Israel*

*E-mail: [sason@yfaat.ch.huji.ac.il](mailto:sason@yfaat.ch.huji.ac.il) Fax: +972-2-6584680; Tel: +972-2-6585909*

### Abbreviations:

SnapX1: snapshot after 1823 ps of production.

SnapX2: snapshot after 1ns of production.

B1: LACVP

B2: LACV3P++\*\*

B3: def2-TZVP

B4: LACV3P+\*

### 1. Protonation scheme:

The resid of the protonated Glu: 4, 13, 35, 140, 252, 348, 373, 409

The resid of the protonated Asp: 199, 222, 231, 251, 369

The resid of the histidines protonated only at  $\delta$ -N atom (HSD): 92, 100, 116, 171, 236, 266, 361, 408, 420, 426

The resid of the histidines protonated only at  $\epsilon$ -N atom (HSE): 388

The resid of the histidines protonated at both  $\epsilon$ - and  $\delta$ -N atom (HSP): 138, 285.

### 2. Active region in QM/MM calculation:

ARG47 THR49 LYS69 SER72 GLN73 ALA74 LEU75 VAL78 PHE81 ALA82 LEU86 PHE87  
TRP96 HSD100 PHE107 ILE153 LEU181 LEU188 LEU233 THR260 PHE261 ILE263 ALA264  
GLY265 GLU267 THR268 THR269 LEU272 LEU322 THR327 ALA328 PRO329 ALA330  
PHE331 SER332 GLU352 MET354 ILE357 PRO392 PHE393 GLY394 ARG398 ALA399  
ILE401 GLY402 GLN403 PHE405 ALA406 LEU437 THR438 HEC2 PFDA METH3 CRYW501  
CRYW504 CRYW510 CRYW515 CRYW521 CRYW537 CRYW544 CRYW548 CRYW749  
CRYW983 CRYW1037 CRYW1275 SOLV33 SOLV40 SOLV313 SOLV380 SOLV794  
SOLV2913 SOLV3233 SOLV3245 SOLV3268 SOLV3461 SOLV3617

### 3. Force field:

The topology and parameter files of Cpd I are taken from previous study.<sup>1</sup> The PFDA is not among the predefined residues of the CHARMM library. It was treated as follows:

- (1) B3LYP/6-31G\* optimization on PFDA (C<sub>9</sub>F<sub>19</sub>COOH) by G09;
- (2) B3LYP/6-31G\* optimization on decanoic acid (DECA, C<sub>9</sub>H<sub>19</sub>COOH) by G09;
- (3) Assigned the atom types of PFDA and DECA according to CHARMM conventions;
- (4) Utilized PARATOOL embedded in VMD<sup>2</sup> to generate topologies and parameters of PFDA and DECA;
- (5) The CHARMM atom types of DECA are CT3, CT2, CD, HA, OB, OH1, H and their related parameters can be found in CHARMM standard parameter library. According to the DECA's CHARMM standard parameters, we assigned the final parameters of PFDA by comparing the parameters of PFDA and DECA generated from step 4.
- (6) The charges of PFDA were chosen in analogy to CHARMM whenever possible and were derived by referring to CGenFF<sup>3</sup> library.
- (7) The resulting parameter set for PFDA was validated by the following set of calculations:
  - (7-1). A water layer of 35 angstroms thickness was constructed around PFDA.
  - (7-2). 200 steps of SD minimization and 1000 steps of ABNR minimization by CHARMM.
  - (7-3). 30ps heating dynamics to 300K, 50 ps equilibration and 200 ps production by

CHARMM.

During the above MD running, the outer 10 angstrom water layer was kept fixed. The RMSD of PFDA between the final CHARMM production structure and the G09 optimized structure is 0.46. The MD results are summarized in Table S1.

Table S1. Representative Bond length (angstrom), angle (degree) and improper torsion angle (degree) in PFDA during MD running.

|             | G09<br>B3LYP/6-31G*<br>optimization | CHARMM<br>Optimization | CHARMM 200 ps production |         |      |
|-------------|-------------------------------------|------------------------|--------------------------|---------|------|
|             |                                     |                        | Minimum                  | Maximum | RMS  |
| C29-F32     | 1.338                               | 1.339                  | 1.263                    | 1.412   | 0.03 |
| C26-F27     | 1.351                               | 1.357                  | 1.293                    | 1.429   | 0.02 |
| C17-F18     | 1.353                               | 1.356                  | 1.284                    | 1.436   | 0.03 |
| C5-F7       | 1.356                               | 1.355                  | 1.293                    | 1.426   | 0.03 |
| C1-O2       | 1.201                               | 1.205                  | 1.157                    | 1.256   | 0.02 |
| C1-O3       | 1.341                               | 1.357                  | 1.248                    | 1.429   | 0.03 |
| O3-H4       | 0.977                               | 0.977                  | 0.977                    | 0.978   | 0.00 |
| F32-C29-C26 | 110.3                               | 110.3                  | 105.0                    | 118.5   | 2.11 |
| C29-C26-C23 | 114.2                               | 115.0                  | 109.8                    | 120.1   | 1.93 |
| C23-C20-C17 | 113.3                               | 114.1                  | 109.1                    | 118.9   | 1.72 |
| C1-C5-C8    | 112.3                               | 112.2                  | 106.4                    | 117.8   | 2.12 |
| F15-C14-F16 | 109.3                               | 108.4                  | 101.7                    | 116.3   | 2.47 |
| O3-C1-O2    | 126.2                               | 123.0                  | 118.4                    | 131.4   | 2.13 |
| O2-C1-C5    | 123.5                               | 123.4                  | 116.3                    | 128.6   | 2.18 |
| O3-C1-C5    | 110.3                               | 113.5                  | 105.9                    | 117.9   | 2.23 |
| H4-O3-C1    | 107.1                               | 104.1                  | 94.5                     | 112.9   | 2.89 |
| O3-C5-O2-C1 | 0.4                                 | -0.7                   | -11.5                    | 11.7    | 3.80 |

1. J. C. Schoneboom, H. Lin, N. Reuter, W. Thiel, S. Cohen, F. Ogliaro and S. Shaik, *J. Am. Chem. Soc.*, 2002, **124**, 8142.
2. W. Humphrey, A. Dalke and K. Schulten, *J. Mol. Graphics*, 1996, **14**, 33.
3. K. Vanommeslaeghe, E. Hatcher, C. Acharya, S. Kundu, S. Zhong, J. Shim, E. Darian, O. Guvench, P. Lopes, I. Vorobyov and A. D. MacKerell, Jr., *J. Comput. Chem.*, 2010, **31**, 671.

### Topology file of PFDA:

```
MASS 102 CX0 12.01100 C !
MASS 103 CX1 12.01100 C !
MASS 104 CX2 12.01100 C !
MASS 105 CX3 12.01100 C !
MASS 106 FX1 18.99840 F !
MASS 107 FX2 18.99840 F !
MASS 108 FX3 18.99840 F !
MASS 109 HX0 1.00800 H !
MASS 110 OX0 15.99900 O !
MASS 111 OX1 15.99900 O !

RESI PFDA 0.000 ? F31 F27 F24 F21 F18 F15 F12 F9 F7 03-H4
GROUP ? \ | | | | | | | | /
ATOM C1 CX0 0.70 ? F32-C29-C26-C23-C20-C17-C14-C11-C8--C5-C1
ATOM O2 OX1 -0.53 ? / | | | | | | | | \
ATOM O3 OX0 -0.58 ? F30 F28 F25 F22 F19 F16 F13 F10 F6 02
ATOM H4 HX0 0.43 ?
ATOM C5 CX1 0.36
ATOM F6 FX1 -0.19
ATOM F7 FX1 -0.19
ATOM F10 FX2 -0.19
ATOM C11 CX2 0.38
ATOM F12 FX2 -0.19
ATOM F13 FX2 -0.19
ATOM C14 CX2 0.38
ATOM F15 FX2 -0.19
ATOM F16 FX2 -0.19
ATOM C17 CX2 0.38
ATOM F18 FX2 -0.19
ATOM F19 FX2 -0.19
ATOM C20 CX2 0.38
ATOM F21 FX2 -0.19
ATOM F22 FX2 -0.19
ATOM C23 CX2 0.38
ATOM F24 FX2 -0.19
ATOM F25 FX2 -0.19
GROUP
ATOM C26 CX2 0.36
ATOM F27 FX2 -0.185
ATOM F28 FX2 -0.185
ATOM C29 CX3 0.445
ATOM F30 FX3 -0.145
ATOM F31 FX3 -0.145
ATOM F32 FX3 -0.145

BOND C1 O2 C1 O3 C1 C5 O3 H4
BOND C5 F6 C5 F7 C5 C8 C8 F9
BOND C8 F10 C8 C11 C11 F12 C11 F13
BOND C11 C14 C14 F15 C14 F16 C14 C17
BOND C17 F18 C17 F19 C17 C20 C20 F21
BOND C20 F22 C20 C23 C23 F24 C23 F25
BOND C23 C26 C26 F27 C26 F28 C26 C29
BOND C29 F30 C29 F31 C29 F32

ANGLE O2 C1 O3 O2 C1 C5 O3 C1 C5
ANGLE C1 O3 H4 C1 C5 F6 C1 C5 F7
ANGLE C1 C5 C8 F6 C5 F7 F6 C5 C8
ANGLE F7 C5 C8 C5 C8 F9 C5 C8 F10
ANGLE C5 C8 C11 F9 C8 F10 F9 C8 C11
ANGLE F10 C8 C11 C8 C11 F12 C8 C11 F13
ANGLE C8 C11 C14 F12 C11 F13 F12 C11 C14
ANGLE F13 C11 C14 C11 C14 F15 C11 C14 F16
ANGLE C11 C14 C17 F15 C14 F16 F15 C14 C17
ANGLE F16 C14 C17 C14 C17 F18 C14 C17 F19
ANGLE C14 C17 C20 F18 C17 F19 F18 C17 C20
ANGLE F19 C17 C20 C17 C20 F21 C17 C20 F22
ANGLE C17 C20 C23 F21 C20 F22 F21 C20 C23
ANGLE F22 C20 C23 C20 C23 F24 C20 C23 F25
ANGLE C20 C23 C26 F24 C23 F25 F24 C23 C26
ANGLE F25 C23 C26 C23 C26 F27 C23 C26 F28
ANGLE C23 C26 C29 F27 C26 F28 F27 C26 C29
ANGLE F28 C26 C29 C26 C29 F30 C26 C29 F31
ANGLE C26 C29 F32 F30 C29 F31 F30 C29 F32
ANGLE F31 C29 F32

DIHED O2 C1 O3 H4 C5 C1 O3 H4
DIHED O2 C1 C5 F6 O2 C1 C5 F7
DIHED O2 C1 C5 C8 O3 C1 C5 F6
DIHED O3 C1 C5 F7 O3 C1 C5 C8
DIHED C1 C5 C8 F9 C1 C5 C8 F10
DIHED C1 C5 C8 C11 F6 C5 C8 F9
DIHED F6 C5 C8 F10 F6 C5 C8 C11
DIHED F7 C5 C8 F9 F7 C5 C8 F10
DIHED F7 C5 C8 C11 C5 C8 C11 F12
DIHED C5 C8 C11 F13 C5 C8 C11 C14
DIHED F9 C8 C11 F12 F9 C8 C11 F13
DIHED F9 C8 C11 C14 F10 C8 C11 F12
DIHED F10 C8 C11 F13 F10 C8 C11 C14
DIHED C8 C11 C14 F15 C8 C11 C14 F16
DIHED C8 C11 C14 C17 F12 C11 C14 F15
DIHED F12 C11 C14 F16 F12 C11 C14 C17
DIHED F13 C11 C14 F15 F13 C11 C14 F16
DIHED F13 C11 C14 C17 C11 C14 C17 F18
DIHED C11 C14 C17 F19 C11 C14 C17 C20
DIHED F15 C14 C17 F18 F15 C14 C17 F19
DIHED F15 C14 C17 C20 F16 C14 C17 F18
DIHED F16 C14 C17 F19 F16 C14 C17 C20
DIHED C14 C17 C20 F21 C14 C17 C20 F22
DIHED C14 C17 C20 C23 F18 C17 C20 F21
DIHED F18 C17 C20 F22 F18 C17 C20 C23
DIHED F19 C17 C20 F21 F19 C17 C20 F22
DIHED F19 C17 C20 C23 C17 C20 C23 F24
DIHED C17 C20 C23 F25 C17 C20 C23 C26
DIHED F21 C20 C23 F24 F21 C20 C23 F25
DIHED F21 C20 C23 C26 F22 C20 C23 F24
DIHED F22 C20 C23 F25 F22 C20 C23 C26
DIHED C20 C23 C26 F27 C20 C23 C26 F28
```

DIHED C20 C23 C26 F27 C20 C23 C26 F28  
DIHED C20 C23 C26 C29 F24 C23 C26 F27  
DIHED F24 C23 C26 F28 F24 C23 C26 C29  
DIHED F25 C23 C26 F27 F25 C23 C26 F28  
DIHED F25 C23 C26 C29 C23 C26 C29 F30  
DIHED C23 C26 C29 F31 C23 C26 C29 F32  
DIHED F27 C26 C29 F30 F27 C26 C29 F31  
DIHED F27 C26 C29 F32 F28 C26 C29 F30  
DIHED F28 C26 C29 F31 F28 C26 C29 F32

IMPR 02 C5 03 C1

DONOR H4 03

ACCEPTOR 02 C1

ACCEPTOR 03 C1

PATCHING FIRS NONE LAST NONE

|        |     |     |     |       |        |         |        |       |
|--------|-----|-----|-----|-------|--------|---------|--------|-------|
| IC F7  | C5  | C8  | F10 | 1.356 | 108.93 | -163.03 | 107.60 | 1.357 |
| IC F7  | C5  | C8  | C11 | 1.356 | 108.93 | 76.53   | 114.19 | 1.558 |
| IC C5  | C8  | C11 | F12 | 1.556 | 114.19 | -43.34  | 108.63 | 1.353 |
| IC C5  | C8  | C11 | F13 | 1.556 | 114.19 | 75.42   | 108.37 | 1.353 |
| IC C5  | C8  | C11 | C14 | 1.556 | 114.19 | -163.68 | 113.41 | 1.561 |
| IC F9  | C8  | C11 | F12 | 1.353 | 108.96 | 78.12   | 108.63 | 1.353 |
| IC F9  | C8  | C11 | F13 | 1.353 | 108.96 | -163.12 | 108.37 | 1.353 |
| IC F9  | C8  | C11 | C14 | 1.353 | 108.96 | -42.21  | 113.41 | 1.561 |
| IC F10 | C8  | C11 | F12 | 1.357 | 108.46 | -163.30 | 108.63 | 1.353 |
| IC F10 | C8  | C11 | F13 | 1.357 | 108.46 | -44.54  | 108.37 | 1.353 |
| IC F10 | C8  | C11 | C14 | 1.357 | 108.46 | 76.37   | 113.41 | 1.561 |
| IC C8  | C11 | C14 | F15 | 1.558 | 113.41 | -42.64  | 108.84 | 1.353 |
| IC C8  | C11 | C14 | F16 | 1.558 | 113.41 | 76.13   | 108.29 | 1.353 |
| IC C8  | C11 | C14 | C17 | 1.558 | 113.41 | -163.04 | 113.37 | 1.561 |
| IC F12 | C11 | C14 | F15 | 1.353 | 108.20 | -163.22 | 108.84 | 1.353 |
| IC F12 | C11 | C14 | F16 | 1.353 | 108.20 | -44.45  | 108.29 | 1.353 |
| IC F12 | C11 | C14 | C17 | 1.353 | 108.20 | 76.38   | 113.37 | 1.561 |
| IC F13 | C11 | C14 | F15 | 1.353 | 108.79 | 78.03   | 108.84 | 1.353 |
| IC F13 | C11 | C14 | F16 | 1.353 | 108.79 | -163.20 | 108.29 | 1.353 |
| IC F13 | C11 | C14 | C17 | 1.353 | 108.79 | -42.37  | 113.37 | 1.561 |
| IC C11 | C14 | C17 | F18 | 1.561 | 113.37 | -42.46  | 108.91 | 1.353 |
| IC C11 | C14 | C17 | F19 | 1.561 | 113.37 | 76.37   | 108.25 | 1.353 |
| IC C11 | C14 | C17 | C20 | 1.561 | 113.37 | -162.88 | 113.26 | 1.561 |
| IC F15 | C14 | C17 | F18 | 1.353 | 108.16 | -163.24 | 108.91 | 1.353 |
| IC F15 | C14 | C17 | F19 | 1.353 | 108.16 | -44.42  | 108.25 | 1.353 |
| IC F15 | C14 | C17 | C20 | 1.353 | 108.16 | 76.33   | 113.26 | 1.561 |
| IC F16 | C14 | C17 | F18 | 1.353 | 108.80 | 78.09   | 108.91 | 1.353 |
| IC F16 | C14 | C17 | F19 | 1.353 | 108.80 | -163.09 | 108.25 | 1.353 |
| IC F16 | C14 | C17 | C20 | 1.353 | 108.80 | -42.33  | 113.26 | 1.561 |
| IC C14 | C17 | C20 | F21 | 1.561 | 113.26 | 76.39   | 108.29 | 1.353 |
| IC C14 | C17 | C20 | F22 | 1.561 | 113.26 | -42.41  | 108.90 | 1.353 |
| IC C14 | C17 | C20 | C23 | 1.561 | 113.26 | -162.78 | 113.32 | 1.560 |
| IC F18 | C17 | C20 | F21 | 1.353 | 108.18 | -44.44  | 108.29 | 1.353 |
| IC F18 | C17 | C20 | F22 | 1.353 | 108.18 | -163.25 | 108.90 | 1.353 |
| IC F18 | C17 | C20 | C23 | 1.353 | 108.18 | 76.39   | 113.32 | 1.560 |
| IC F19 | C17 | C20 | F21 | 1.353 | 108.82 | -163.18 | 108.29 | 1.353 |
| IC F19 | C17 | C20 | F22 | 1.353 | 108.82 | 78.02   | 108.90 | 1.353 |
| IC F19 | C17 | C20 | C23 | 1.353 | 108.82 | -42.34  | 113.32 | 1.560 |
| IC C17 | C20 | C23 | F24 | 1.561 | 113.32 | -42.71  | 109.03 | 1.353 |
| IC C17 | C20 | C23 | F25 | 1.561 | 113.32 | 75.96   | 108.25 | 1.354 |
| IC C17 | C20 | C23 | C26 | 1.561 | 113.32 | -163.23 | 113.58 | 1.556 |
| IC F21 | C20 | C23 | F24 | 1.353 | 108.83 | 77.82   | 109.03 | 1.353 |
| IC F21 | C20 | C23 | F25 | 1.353 | 108.83 | -163.51 | 108.25 | 1.354 |
| IC F21 | C20 | C23 | C26 | 1.353 | 108.83 | -42.71  | 113.58 | 1.556 |
| IC F22 | C20 | C23 | F24 | 1.353 | 108.12 | -163.51 | 109.03 | 1.353 |
| IC F22 | C20 | C23 | F25 | 1.353 | 108.12 | -44.84  | 108.25 | 1.354 |
| IC F22 | C20 | C23 | C26 | 1.353 | 108.12 | 75.96   | 113.58 | 1.556 |
| IC C20 | C23 | C26 | F27 | 1.560 | 113.58 | 75.21   | 108.61 | 1.351 |
| IC C20 | C23 | C26 | F28 | 1.560 | 113.58 | -43.94  | 109.22 | 1.354 |
| IC C20 | C23 | C26 | C29 | 1.560 | 113.58 | -164.53 | 114.18 | 1.553 |
| IC F24 | C23 | C26 | F27 | 1.353 | 108.04 | -45.87  | 108.61 | 1.351 |
| IC F24 | C23 | C26 | F28 | 1.353 | 108.04 | -165.02 | 109.22 | 1.354 |
| IC F24 | C23 | C26 | C29 | 1.353 | 108.04 | 74.39   | 114.18 | 1.553 |
| IC F25 | C23 | C26 | F27 | 1.354 | 108.69 | -164.24 | 108.61 | 1.351 |
| IC F25 | C23 | C26 | F28 | 1.354 | 108.69 | 76.61   | 109.22 | 1.354 |
| IC F25 | C23 | C26 | C29 | 1.354 | 108.69 | -43.97  | 114.18 | 1.553 |
| IC C23 | C26 | C29 | F30 | 1.556 | 114.18 | -50.16  | 110.29 | 1.340 |
| IC C23 | C26 | C29 | F31 | 1.556 | 114.18 | 70.80   | 110.67 | 1.337 |
| IC C23 | C26 | C29 | F32 | 1.556 | 114.18 | -169.63 | 108.91 | 1.338 |
| IC F27 | C26 | C29 | F30 | 1.351 | 107.76 | 70.57   | 110.29 | 1.340 |
| IC F27 | C26 | C29 | F31 | 1.351 | 107.76 | -168.46 | 110.67 | 1.337 |
| IC F27 | C26 | C29 | F32 | 1.351 | 107.76 | -48.90  | 108.91 | 1.338 |
| IC F28 | C26 | C29 | F30 | 1.354 | 107.67 | -171.61 | 110.29 | 1.340 |
| IC F28 | C26 | C29 | F31 | 1.354 | 107.67 | -50.65  | 110.67 | 1.337 |
| IC F28 | C26 | C29 | F32 | 1.354 | 107.67 | 68.91   | 108.91 | 1.338 |

END

### Parameter file of PFDA:

#### BONDS

|     |     |          |        |
|-----|-----|----------|--------|
| OX0 | HX0 | 542.882  | 0.9769 |
| CX0 | OX0 | 258.151  | 1.3415 |
| CX0 | OX1 | 788.248  | 1.2013 |
| CX0 | CX1 | 177.447  | 1.5501 |
| CX1 | FX1 | 371.438  | 1.3527 |
| CX1 | CX2 | 212.207  | 1.5555 |
| CX2 | FX2 | 383.700  | 1.3533 |
| CX2 | CX2 | 205.2198 | 1.5595 |
| CX2 | CX3 | 207.354  | 1.5530 |
| CX3 | FX3 | 401.534  | 1.3383 |

#### ANGLES

|     |     |     |        |        |        |       |
|-----|-----|-----|--------|--------|--------|-------|
| OX1 | CX0 | OX0 | 46.377 | 126.20 | 194.78 | 2.268 |
| OX1 | CX0 | CX1 | 66.728 | 123.53 | 19.06  | 2.430 |
| OX0 | CX0 | CX1 | 53.050 | 110.26 |        |       |
| CX0 | OX0 | HX0 | 54.000 | 107.12 |        |       |
| CX0 | CX1 | FX1 | 51.369 | 108.70 | 46.70  | 2.362 |
| CX0 | CX1 | CX2 | 66.091 | 112.32 |        |       |
| FX1 | CX1 | FX1 | 69.357 | 109.26 | 10.55  | 2.206 |
| FX1 | CX1 | CX2 | 44.474 | 108.91 | 37.81  | 2.369 |
| CX1 | CX2 | FX2 | 43.394 | 108.05 | 36.89  | 2.358 |
| CX1 | CX2 | CX2 | 84.314 | 114.19 | 16.13  | 2.614 |
| FX2 | CX2 | FX2 | 65.87  | 109.16 | 10.00  | 2.207 |
| FX2 | CX2 | CX2 | 43.819 | 108.57 | 37.25  | 2.368 |
| CX2 | CX2 | CX2 | 89.376 | 113.39 | 17.09  | 2.608 |
| CX2 | CX2 | CX3 | 85.877 | 114.18 | 11.85  | 2.610 |
| FX2 | CX2 | CX3 | 56.103 | 107.72 | 36.53  | 2.349 |
| CX2 | CX3 | FX3 | 63.800 | 109.96 | 41.54  | 2.371 |
| FX3 | CX3 | FX3 | 80.626 | 108.97 | 12.26  | 2.179 |

#### DIHEDRALS

|     |     |     |     |      |   |        |
|-----|-----|-----|-----|------|---|--------|
| OX1 | CX0 | OX0 | HX0 | 2.05 | 2 | 180.00 |
| CX1 | CX0 | OX0 | HX0 | 2.05 | 2 | 180.00 |
| OX1 | CX0 | CX1 | FX1 | 0.00 | 6 | 180.00 |
| OX1 | CX0 | CX1 | CX2 | 0.00 | 6 | 180.00 |
| OX0 | CX0 | CX1 | FX1 | 0.00 | 6 | 180.00 |
| OX0 | CX0 | CX1 | CX2 | 0.00 | 6 | 180.00 |
| CX0 | CX1 | CX2 | FX2 | 0.35 | 3 | 0.00   |
| CX0 | CX1 | CX2 | CX2 | 0.35 | 3 | 0.00   |
| CX1 | CX2 | CX2 | FX2 | 0.35 | 3 | 0.00   |
| FX1 | CX1 | CX2 | FX2 | 0.35 | 3 | 0.00   |
| FX1 | CX1 | CX2 | CX2 | 0.35 | 3 | 0.00   |
| CX1 | CX2 | CX2 | CX2 | 0.35 | 3 | 0.00   |
| FX2 | CX2 | CX2 | FX2 | 0.35 | 3 | 0.00   |
| FX2 | CX2 | CX2 | CX2 | 0.35 | 3 | 0.00   |
| FX2 | CX2 | CX2 | CX3 | 0.35 | 3 | 0.00   |
| CX2 | CX2 | CX3 | FX3 | 0.35 | 3 | 0.00   |
| FX2 | CX2 | CX3 | FX3 | 0.35 | 3 | 0.00   |
| CX2 | CX2 | CX2 | CX3 | 0.25 | 1 | 0.00   |
| CX2 | CX2 | CX2 | CX2 | 0.25 | 1 | 0.00   |

#### improper

|     |     |     |     |          |   |       |
|-----|-----|-----|-----|----------|---|-------|
| OX1 | CX1 | OX0 | CX0 | 100.0000 | 0 | 0.000 |
|-----|-----|-----|-----|----------|---|-------|

#### NONBONDED

|     |     |         |        |     |
|-----|-----|---------|--------|-----|
| CX0 | 0.0 | -0.0700 | 2.0000 | !   |
| OX1 | 0.0 | -0.1200 | 1.7000 | 0.0 |
| OX0 | 0.0 | -0.1521 | 1.7700 | !   |
| HX0 | 0.0 | -0.0460 | 0.2245 | !   |
| CX1 | 0.0 | -0.0420 | 2.0500 | !   |
| FX1 | 0.0 | -0.1050 | 1.6300 | !   |
| CX2 | 0.0 | -0.0420 | 2.0500 | !   |
| FX2 | 0.0 | -0.1050 | 1.6300 | !   |
| CX3 | 0.0 | -0.0200 | 2.3000 | !   |
| FX3 | 0.0 | -0.0970 | 1.6000 | !   |

#### 4. QM/MM results:

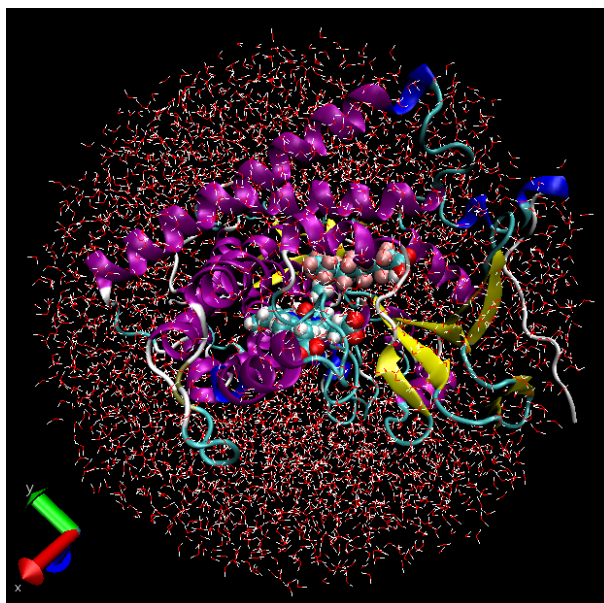

Figure S1. P450BM3 with solvent shell from partial solvation setup. PFDA, methane and Cpd I are shown in VDW model. Waters are shown in lines.

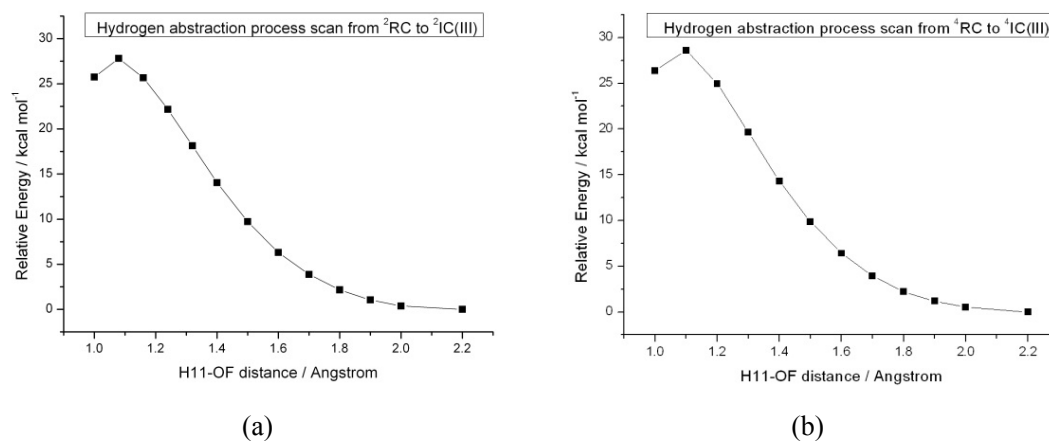

Figure S2. Energy scans for hydrogen abstraction process starting (a) from <sup>2</sup>RC to <sup>2</sup>IC(III) and (b) from <sup>4</sup>RC to <sup>4</sup>IC(III). H11 is hydrogen atoms of methane abstracted to OF, the ferryl-oxo oxygen atom, of Cpd I.

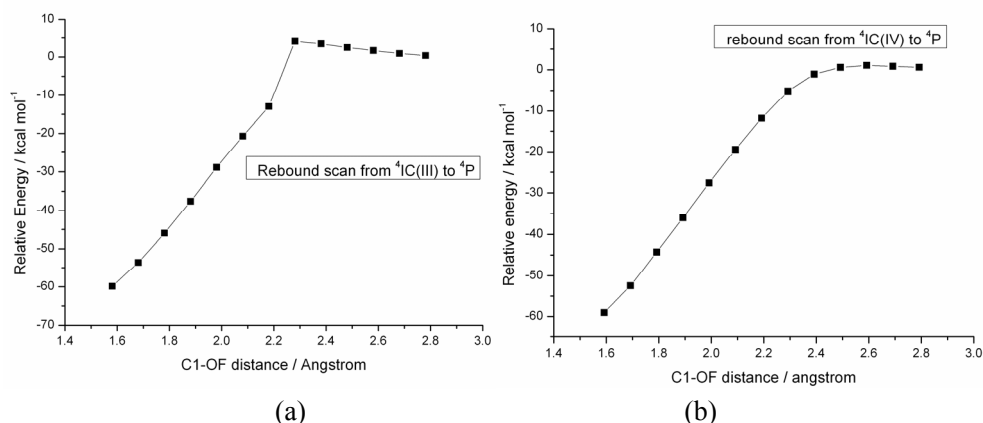

Figure S3. Energy scans for rebound process starting from radical intermediates (a)  ${}^4\text{IC(III)}$  and (b)  ${}^4\text{IC(IV)}$  to hydroxylated products. C1 is carbon atoms of methane and OF is ferryl-oxo oxygen atom of Cpd I.

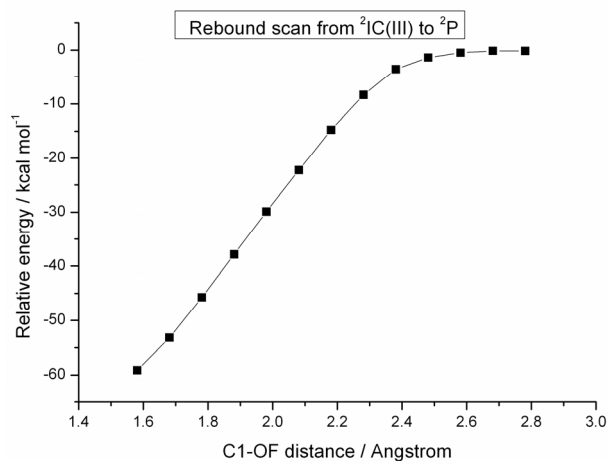

Figure S4. Energy scans for rebound process starting from  ${}^2\text{IC(III)}$  to hydroxylated products. C1 is carbon atoms of methane and OF is ferryl-oxo oxygen atom of Cpd I.

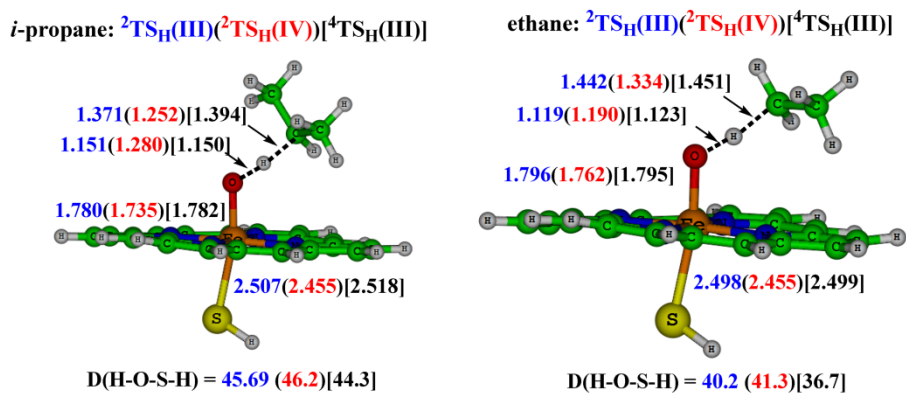

Figure S5. Geometry structures of the QM/MM optimized hydrogen abstraction transition states of *i*-propane and ethane hydroxylation by Cpd I at B3LYP/B1 level.



**Table S2. QM/MM computed relative Energy (in kcal mol<sup>-1</sup>) of the species in methane hydroxylation by Cpd I from SnapX1 and SnapX2 at virous computational levels.**

|                                      | B1    | B1+ZPE | B2    | B2+ZPE | B3    | B3+ZPE |
|--------------------------------------|-------|--------|-------|--------|-------|--------|
| SnapX1                               |       |        |       |        |       |        |
| <sup>2</sup> RC                      | 0.0   | 0.0    | 0.0   | 0.0    | 0.0   | 0.0    |
| <sup>4</sup> RC                      | -0.1  | 0.0    | -0.1  | 0.0    | 0.1   | 0.1    |
| <sup>2</sup> TS <sub>H</sub> (III)   | 27.3  | 22.9   | 23.5  | 19.1   | 26.1  | 21.7   |
| <sup>2</sup> TS <sub>H</sub> (IV)    | 28.5  | 25.1   | 21.7  | 18.2   | 22.2  | 18.8   |
| <sup>4</sup> TS <sub>H</sub> (III)   | 28.0  | 23.6   | 24.4  | 20.0   | 27.0  | 22.7   |
| <sup>2</sup> IC(III)                 | 24.9  | 22.6   | 17.7  | 15.4   | 20.8  | 18.5   |
| <sup>2</sup> IC(IV)                  | 25.8  | 23.9   | 14.9  | 13.0   | 15.5  | 13.6   |
| <sup>4</sup> IC(III)                 | 25.4  | 22.3   | 18.1  | 15.1   | 21.2  | 18.1   |
| <sup>4</sup> IC(IV)                  | 26.2  | 24.2   | 15.1  | 13.1   | 15.8  | 13.7   |
| <sup>4</sup> TS <sub>reb</sub> (III) | 29.4  | 26.4   | 22.4  | 19.4   | 25.9  | 22.9   |
| <sup>2</sup> P                       | -37.2 | -34.6  | -48.0 | -45.4  | -44.4 | -41.8  |
| <sup>4</sup> P                       | -38.1 | -36.6  | -50.2 | -48.8  | -46.2 | -44.7  |
| SnapX2                               |       |        |       |        |       |        |
| <sup>2</sup> RC                      | 0.0   | 0.0    | 0.0   | 0.0    |       |        |
| <sup>4</sup> RC                      | -0.1  | 0.2    | 0.0   | 0.4    |       |        |
| <sup>2</sup> TS <sub>H</sub> (III)   | 27.9  | 24.7   | 23.6  | 20.5   |       |        |
| <sup>2</sup> TS <sub>H</sub> (IV)    | 28.5  | 25.3   | 21.3  | 19.5   |       |        |
| <sup>4</sup> TS <sub>H</sub> (III)   | 28.7  | 25.1   | 24.7  | 21.2   |       |        |
| <sup>2</sup> IC(III)                 | 25.9  | 24.2   | 18.4  | 16.9   |       |        |
| <sup>2</sup> IC(IV)                  | 25.4  | 23.7   | 14.0  | 12.3   |       |        |
| <sup>4</sup> IC(III)                 | 26.3  | 24.4   | 18.8  | 17.0   |       |        |
| <sup>4</sup> IC(IV)                  | 26.9  | 25.0   | 15.2  | 13.3   |       |        |
| <sup>4</sup> TS <sub>reb</sub> (III) | 32.4  | 29.6   | 25.0  | 22.2   |       |        |
| <sup>2</sup> P                       | -34.7 | -32.5  | -46.0 | -43.3  |       |        |
| <sup>4</sup> P                       | -35.0 | -33.1  | -47.8 | -45.7  |       |        |

**Table S3. QM/MM computed relative Energy (in kcal mol<sup>-1</sup>) of the species in ethane hydroxylation by Cpd I at various computational levels.**

|                                      | B1    | B1+ZPE | B2    | B2+ZPE | B3    | B3+ZPE |
|--------------------------------------|-------|--------|-------|--------|-------|--------|
| <sup>2</sup> RC                      | 0.0   | 0.0    | 0.0   | 0.0    | 0.0   | 0.0    |
| <sup>4</sup> RC                      | -0.1  | 0.0    | 0.0   | 0.1    | 0.1   | 0.3    |
| <sup>2</sup> TS <sub>H</sub> (III)   | 22.6  | 18.6   | 19.7  | 15.7   | 22.5  | 18.5   |
| <sup>2</sup> TS <sub>H</sub> (IV)    | 23.8  | 19.8   | 17.9  | 13.9   | 18.5  | 14.5   |
| <sup>4</sup> TS <sub>H</sub> (III)   | 23.5  | 19.6   | 20.7  | 16.8   | 23.5  | 19.6   |
| <sup>2</sup> IC(III)                 | 18.1  | 16.1   | 10.8  | 8.8    | 14.0  | 12.0   |
| <sup>2</sup> IC(IV)                  | 18.6  | 16.6   | 7.8   | 5.8    | 8.4   | 6.4    |
| <sup>4</sup> IC(III)                 | 17.9  | 16.0   | 10.7  | 8.8    | 13.7  | 11.9   |
| <sup>4</sup> IC(IV)                  | 19.1  | 17.9   | 8.1   | 6.9    | 8.4   | 7.2    |
| <sup>4</sup> TS <sub>reb</sub> (III) | 21.8  | 18.8   | 14.8  | 11.8   | 18.3  | 15.2   |
| <sup>2</sup> P                       | -42.3 | -40.2  | -53.4 | -51.2  | -49.7 | -47.5  |
| <sup>4</sup> P                       | -45.0 | -43.8  | -57.3 | -56.1  | -53.3 | -52.1  |

**Table S4. QM/MM computed relative Energy (in kcal mol<sup>-1</sup>) of the species in *i*-propane hydroxylation by Cpd I at various computational levels.**

|                                      | B1    | B1+ZPE | B2    | B2+ZPE | B3    | B3+ZPE |
|--------------------------------------|-------|--------|-------|--------|-------|--------|
| <sup>2</sup> RC                      | 0.0   | 0.0    | 0.0   | 0.0    | 0.0   | 0.0    |
| <sup>4</sup> RC                      | -0.2  | 0.1    | -0.1  | 0.1    | 0.1   | 0.3    |
| <sup>2</sup> TS <sub>H</sub> (III)   | 17.9  | 13.3   | 16.3  | 11.7   | 18.6  | 9.3    |
| <sup>2</sup> TS <sub>H</sub> (IV)    | 18.7  | 14.7   | 14.5  | 10.5   | 14.8  | 10.8   |
| <sup>4</sup> TS <sub>H</sub> (III)   | 19.0  | 15.2   | 17.7  | 13.8   | 20.3  | 16.4   |
| <sup>2</sup> IC(III)                 | 13.8  | 12.0   | 7.7   | 5.9    | 10.6  | 8.9    |
| <sup>2</sup> IC(IV)                  | 13.5  | 11.1   | 4.1   | 1.7    | 4.6   | 2.3    |
| <sup>4</sup> IC(III)                 | 14.3  | 11.6   | 8.1   | 5.5    | 11.1  | 8.5    |
| <sup>4</sup> IC(IV)                  | 14.2  | 11.9   | 4.5   | 2.3    | 5.1   | 2.8    |
| <sup>4</sup> TS <sub>reb</sub> (III) | 18.7  | 16.1   | 12.8  | 10.2   | 16.4  | 13.8   |
| <sup>2</sup> P                       | -47.0 | -45.3  | -55.6 | -53.9  | -51.4 | -49.7  |
| <sup>4</sup> P                       | -49.4 | -47.8  | -60.2 | -58.7  | -56.2 | -54.7  |

**Table S5. QM/MM computed mulliken group spin densities ( $\rho$ ) and NBO charges ( $Q$ ) of the species in methane hydroxylation by Cpd I at B3LYP/B2//B1 level.**

|                                      | $\rho$ |       |       |       |           |       |       |
|--------------------------------------|--------|-------|-------|-------|-----------|-------|-------|
|                                      | Fe     | O     | Por   | SH    | substrate |       |       |
|                                      |        |       |       |       | H         | C     | sub-H |
| <sup>2</sup> RC                      | 1.33   | 0.86  | -0.89 | -0.31 |           |       |       |
| <sup>4</sup> RC                      | 1.12   | 0.92  | 0.70  | 0.25  |           |       |       |
| <sup>2</sup> TS <sub>H</sub> (III)   | 1.03   | 0.36  | -0.84 | -0.22 | -0.04     | 0.78  | 0.71  |
| <sup>2</sup> TS <sub>H</sub> (IV)    | 1.95   | -0.03 | -0.14 | -0.17 | 0.02      | -0.69 | -0.63 |
| <sup>4</sup> TS <sub>H</sub> (III)   | 0.79   | 0.45  | 0.90  | 0.19  | -0.05     | 0.78  | 0.71  |
| <sup>2</sup> IC(III)                 | 1.09   | 0.10  | -0.92 | -0.21 | 0.00      | 1.08  | 0.96  |
| <sup>2</sup> IC(IV)                  | 1.99   | 0.18  | -0.09 | -0.13 | -0.01     | -1.06 | -0.94 |
| <sup>4</sup> IC(III)                 | 0.79   | 0.18  | 0.90  | 0.17  | -0.01     | 1.09  | 0.96  |
| <sup>4</sup> IC(IV)                  | 1.97   | 0.21  | -0.05 | -0.10 | 0.02      | 1.08  | 0.96  |
| <sup>4</sup> TS <sub>reb</sub> (III) | 1.03   | -0.11 | 0.94  | 0.26  | 0.03      | 0.95  | 0.84  |
| <sup>2</sup> P                       | 0.97   | -0.01 | 0.04  | -0.01 | 0.00      | 0.00  | 0.01  |
| <sup>4</sup> P                       | 2.97   | -0.02 | -0.26 | 0.30  | 0.00      | 0.00  | 0.01  |
|                                      | $Q$    |       |       |       |           |       |       |
|                                      | Fe     | O     | Por   | SH    | substrate |       |       |
|                                      |        |       |       |       | H         | C     | sub-H |
| <sup>2</sup> RC                      | 0.95   | -0.47 | -0.02 | -0.45 |           |       |       |
| <sup>4</sup> RC                      | 0.93   | -0.46 | -0.02 | -0.45 |           |       |       |
| <sup>2</sup> TS <sub>H</sub> (III)   | 0.99   | -0.77 | -0.10 | -0.45 | 0.38      | -0.60 | -0.04 |
| <sup>2</sup> TS <sub>H</sub> (IV)    | 1.11   | -0.69 | -0.45 | -0.34 | 0.36      | -0.57 | 0.01  |
| <sup>4</sup> TS <sub>H</sub> (III)   | 0.98   | -0.76 | -0.09 | -0.46 | 0.38      | -0.60 | -0.05 |
| <sup>2</sup> IC(III)                 | 0.99   | -0.87 | -0.10 | -0.46 | 0.44      | -0.50 | 0.00  |
| <sup>2</sup> IC(IV)                  | 1.14   | -0.82 | -0.46 | -0.34 | 0.46      | -0.50 | 0.01  |
| <sup>4</sup> IC(III)                 | 0.98   | -0.87 | -0.08 | -0.47 | 0.44      | -0.50 | 0.00  |
| <sup>4</sup> IC(IV)                  | 1.14   | -0.82 | -0.46 | -0.34 | 0.46      | -0.50 | 0.01  |
| <sup>4</sup> TS <sub>reb</sub> (III) | 1.03   | -0.86 | -0.19 | -0.47 | 0.45      | -0.45 | 0.04  |
| <sup>2</sup> P                       | 0.98   | -0.73 | -0.77 | -0.34 | 0.51      | -0.20 | 0.35  |
| <sup>4</sup> P                       | 1.33   | -0.77 | -0.81 | -0.57 | 0.49      | -0.20 | 0.32  |

**Table S6. QM/MM computed mulliken group spin densities ( $\rho$ ) and NBO charges ( $Q$ ) of the species in ethane hydroxylation by Cpd I at B3LYP/B2//B1 level.**

|                                      | $\rho$ |       |       |       |           |       |       |
|--------------------------------------|--------|-------|-------|-------|-----------|-------|-------|
|                                      | Fe     | O     | Por   | SH    | substrate |       |       |
|                                      |        |       |       |       | H         | C     | sub-H |
| <sup>2</sup> RC                      | 1.34   | 0.87  | -0.91 | -0.30 |           |       |       |
| <sup>4</sup> RC                      | 1.10   | 0.92  | 0.73  | 0.24  |           |       |       |
| <sup>2</sup> TS <sub>H</sub> (III)   | 1.05   | 0.40  | -0.77 | -0.21 | -0.04     | 0.64  | 0.58  |
| <sup>2</sup> TS <sub>H</sub> (IV)    | 1.85   | -0.08 | -0.09 | -0.14 | 0.01      | -0.53 | -0.54 |
| <sup>4</sup> TS <sub>H</sub> (III)   | 0.80   | 0.49  | 0.88  | 0.20  | -0.05     | 0.68  | 0.67  |
| <sup>2</sup> IC(III)                 | 1.03   | 0.08  | -0.90 | -0.19 | 0.01      | 1.06  | 0.97  |
| <sup>2</sup> IC(IV)                  | 1.97   | 0.19  | -0.07 | -0.12 | -0.01     | -1.03 | -0.96 |
| <sup>4</sup> IC(III)                 | 0.75   | 0.16  | 0.92  | 0.18  | -0.01     | 1.08  | 0.99  |
| <sup>4</sup> IC(IV)                  | 1.92   | 0.19  | -0.01 | -0.11 | 0.03      | 1.05  | 0.98  |
| <sup>4</sup> TS <sub>reb</sub> (III) | 1.00   | -0.09 | 0.98  | 0.24  | 0.03      | 0.92  | 0.83  |
| <sup>2</sup> P                       | 0.95   | -0.01 | 0.11  | -0.05 | 0.00      | 0.00  | 0.00  |
| <sup>4</sup> P                       | 2.96   | -0.02 | -0.24 | 0.30  | 0.00      | 0.00  | 0.00  |
|                                      | $Q$    |       |       |       |           |       |       |
|                                      | Fe     | O     | Por   | SH    | substrate |       |       |
|                                      |        |       |       |       | H         | C     | sub-H |
| <sup>2</sup> RC                      | 0.94   | -0.47 | -0.02 | -0.46 |           |       |       |
| <sup>4</sup> RC                      | 0.93   | -0.46 | -0.02 | -0.46 |           |       |       |
| <sup>2</sup> TS <sub>H</sub> (III)   | 0.98   | -0.73 | -0.13 | -0.45 | 0.36      | -0.40 | -0.03 |
| <sup>2</sup> TS <sub>H</sub> (IV)    | 1.10   | -0.64 | -0.45 | -0.36 | 0.34      | -0.39 | 0.02  |
| <sup>4</sup> TS <sub>H</sub> (III)   | 0.98   | -0.73 | -0.09 | -0.47 | 0.36      | -0.41 | -0.05 |
| <sup>2</sup> IC(III)                 | 0.99   | -0.88 | -0.09 | -0.47 | 0.44      | -0.29 | 0.00  |
| <sup>2</sup> IC(IV)                  | 1.14   | -0.82 | -0.45 | -0.35 | 0.46      | -0.30 | 0.01  |
| <sup>4</sup> IC(III)                 | 0.97   | -0.88 | -0.08 | -0.46 | 0.44      | -0.29 | 0.00  |
| <sup>4</sup> IC(IV)                  | 1.14   | -0.82 | -0.45 | -0.35 | 0.47      | -0.29 | 0.01  |
| <sup>4</sup> TS <sub>reb</sub> (III) | 1.02   | -0.87 | -0.18 | -0.49 | 0.45      | -0.22 | 0.07  |
| <sup>2</sup> P                       | 1.02   | -0.77 | -0.77 | -0.34 | 0.51      | -0.01 | 0.35  |
| <sup>4</sup> P                       | 1.34   | -0.79 | -0.80 | -0.57 | 0.50      | -0.02 | 0.32  |

**Table S7. QM/MM computed mulliken group spin densities ( $\rho$ ) and NBO charges (Q) of the species in *i*-propane hydroxylation by Cpd I at B3LYP/B2//B1 level.**

|                                      | $\rho$ |       |       |       |           |       |       |
|--------------------------------------|--------|-------|-------|-------|-----------|-------|-------|
|                                      | Fe     | O     | Por   | SH    | substrate |       |       |
|                                      |        |       |       |       | H         | C     | sub-H |
| <sup>2</sup> RC                      | 1.36   | 0.89  | -0.97 | -0.27 |           |       |       |
| <sup>4</sup> RC                      | 1.11   | 0.95  | 0.74  | 0.21  |           |       |       |
| <sup>2</sup> TS <sub>H</sub> (III)   | 1.02   | 0.42  | -0.71 | -0.22 | -0.02     | 0.48  | 0.49  |
| <sup>2</sup> TS <sub>H</sub> (IV)    | 1.72   | -0.12 | -0.08 | -0.12 | 0.00      | -0.38 | -0.40 |
| <sup>4</sup> TS <sub>H</sub> (III)   | 0.70   | 0.54  | 0.99  | 0.19  | -0.02     | 0.59  | 0.60  |
| <sup>2</sup> IC(III)                 | 1.03   | 0.10  | -0.86 | -0.19 | 0.00      | 0.95  | 0.93  |
| <sup>2</sup> IC(IV)                  | 1.86   | 0.22  | -0.08 | -0.11 | 0.01      | -0.91 | -0.90 |
| <sup>4</sup> IC(III)                 | 0.68   | 0.18  | 1.03  | 0.16  | 0.00      | 0.98  | 0.95  |
| <sup>4</sup> IC(IV)                  | 1.82   | 0.23  | 0.08  | -0.08 | 0.02      | 0.95  | 0.93  |
| <sup>4</sup> TS <sub>reb</sub> (III) | 0.91   | -0.07 | 1.07  | 0.23  | 0.03      | 0.84  | 0.82  |
| <sup>2</sup> P                       | 1.00   | -0.01 | 0.07  | -0.08 | 0.01      | 0.00  | 0.01  |
| <sup>4</sup> P                       | 2.99   | -0.01 | -0.26 | 0.29  | -0.01     | -0.01 | 0.00  |
|                                      | Q      |       |       |       |           |       |       |
|                                      | Fe     | O     | Por   | SH    | substrate |       |       |
|                                      |        |       |       |       | H         | C     | sub-H |
| <sup>2</sup> RC                      | 0.94   | -0.45 | -0.01 | -0.48 |           |       |       |
| <sup>4</sup> RC                      | 0.93   | -0.44 | 0.00  | -0.49 |           |       |       |
| <sup>2</sup> TS <sub>H</sub> (III)   | 0.98   | -0.69 | -0.15 | -0.47 | 0.34      | -0.22 | -0.01 |
| <sup>2</sup> TS <sub>H</sub> (IV)    | 1.09   | -0.57 | -0.41 | -0.39 | 0.31      | -0.25 | -0.02 |
| <sup>4</sup> TS <sub>H</sub> (III)   | 0.98   | -0.70 | -0.09 | -0.49 | 0.36      | -0.24 | -0.06 |
| <sup>2</sup> IC(III)                 | 1.00   | -0.86 | -0.12 | -0.50 | 0.44      | -0.11 | 0.03  |
| <sup>2</sup> IC(IV)                  | 1.13   | -0.79 | -0.47 | -0.38 | 0.46      | -0.12 | 0.04  |
| <sup>4</sup> IC(III)                 | 0.99   | -0.85 | -0.09 | -0.50 | 0.44      | -0.12 | 0.01  |
| <sup>4</sup> IC(IV)                  | 1.14   | -0.79 | -0.47 | -0.37 | 0.47      | -0.12 | 0.03  |
| <sup>4</sup> TS <sub>reb</sub> (III) | 1.03   | -0.87 | -0.22 | -0.50 | 0.45      | -0.02 | 0.12  |
| <sup>2</sup> P                       | 1.04   | -0.75 | -0.73 | -0.40 | 0.50      | 0.12  | 0.35  |
| <sup>4</sup> P                       | 1.35   | -0.78 | -0.79 | -0.58 | 0.48      | 0.12  | 0.32  |

## 5. QM results:

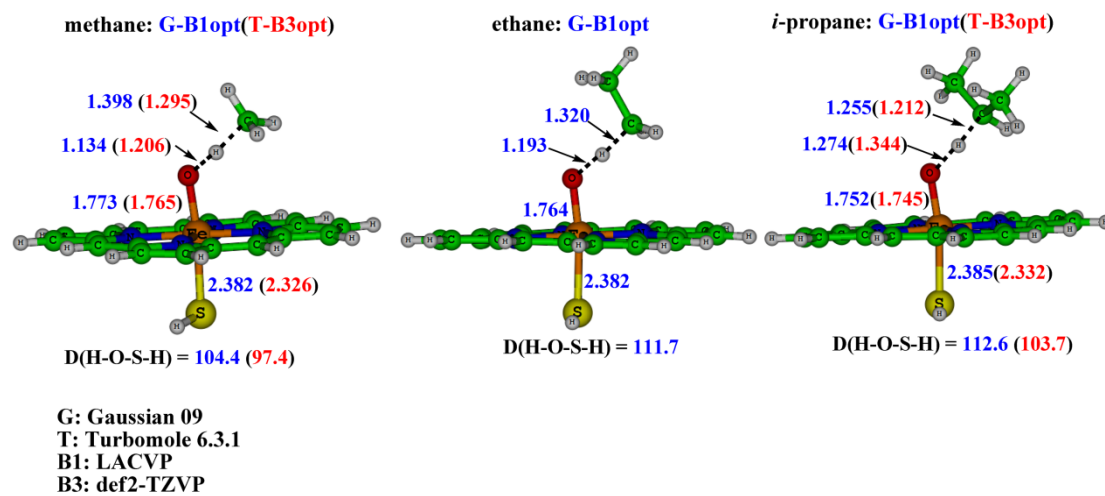

Figure S6. Geometry structures of the QM optimized  $^2\text{TS}_{\text{H}}(\text{IV})$  of methane, *i*-propane and ethane hydroxylation by Cpd I at various levels.

**Abbreviations:**

G: Gaussian09; J: Jaguar7.8; T: Turbomole6.3.1;

B1: LACVP; B2: LACV3P++\*\*;; B3: def2-TZVP; B4: LACV3P+\*; B5: Wachters full electron (Fe)/6-311++G\*\*(rest)

B6: aug-cc-pVTZ

Ref 4: S. Shaik, D. Kumar and S. P. de Visser, *J. Am. Chem. Soc.*, 2008, **130**, 10128.

Table S8. Barriers (in kcal mol<sup>-1</sup>) relative to separated reactant <sup>2</sup>Cpd I + Alk-H using G-B1 optimized geometry structure. Data are given as  $\Delta E^\ddagger + ZPE^\ddagger$  and  $ZPE^\ddagger$  are from G-B1.

|                   |                                                 | G-B1 optimization |            |            |            |                   |            |            |            |
|-------------------|-------------------------------------------------|-------------------|------------|------------|------------|-------------------|------------|------------|------------|
|                   |                                                 | G-B1              | G-B2//G-B1 | J-B2//G-B1 | G-B4//G-B1 | J-B4//G-B1        | T-B3//G-B1 | G-B5//G-B1 | G-B6//G-B1 |
| methane           | <sup>2</sup> TS <sub>H</sub> (III) <sup>a</sup> | 22.2              | 19.1       | 19.0       | 22.0       | 22.3 <sup>c</sup> | 22.3       |            |            |
|                   | <sup>2</sup> TS <sub>H</sub> (IV) <sup>b</sup>  | 21.4              | 15.2       | 15.6       | 18.0       | 19.0              | 16.5       | 16.1       | 19.2       |
| <i>i</i> -propane | <sup>2</sup> TS <sub>H</sub> (IV) <sup>a</sup>  | 14.1              | 10.9       | 11.5       | 12.7       | 13.9 <sup>c</sup> | 12.4       |            |            |
|                   | <sup>2</sup> TS <sub>H</sub> (IV) <sup>b</sup>  | 13.4              | 9.8        | 10.4       | 11.5       | 12.5              | 11.2       |            |            |

<sup>a</sup>Geometry structure of the transition states are from ref. 4; <sup>b</sup>This work. <sup>c</sup>These are the data published in Table 1 of ref. 4.

Table S9. Barriers (in kcal mol<sup>-1</sup>) relative to separated reactant <sup>2</sup>Cpd I + Alk-H using T-B3 optimized geometry structure. Data are given as  $\Delta E^\ddagger + ZPE^\ddagger$  and  $ZPE^\ddagger$  are from T-B3.

|                                                                   | T-B3 | G-B2//T-B3 | J-B2//T-B3 | G-B4//T-B3 | J-B4//T-B3 | T-B6//T-B3 |
|-------------------------------------------------------------------|------|------------|------------|------------|------------|------------|
| Methane: <sup>2</sup> TS <sub>H</sub> (IV) <sup>a</sup>           | 18.1 | 17.1       | 17.4       | 19.2       | 19.9       | 17.4       |
| <i>i</i> -propane: <sup>2</sup> TS <sub>H</sub> (IV) <sup>a</sup> | 12.1 | 10.9       | 11.6       | 12.2       | 12.9       | 11.6       |

<sup>a</sup>This work.

**Table S10. QM computed mulliken group spin densities ( $\rho$ ) and NBO charges ( $Q$ ) of the  $^2\text{TS}_{\text{H}}(\text{IV})$  in methane, ethane and *i*-propane hydroxylation by Cpd I at B3LYP/B1 and B3LYP/B3 level.**

|                                     | Alkane            | Level               | $\rho$ |       |       |       |           |       |       |
|-------------------------------------|-------------------|---------------------|--------|-------|-------|-------|-----------|-------|-------|
|                                     |                   |                     | Fe     | O     | Por   | SH    | substrate |       |       |
|                                     |                   |                     |        |       |       |       | H         | C     | sub-H |
| $^2\text{TS}_{\text{H}}(\text{IV})$ | Methane           | G-B1 <sup>a</sup>   | 1.83   | -0.02 | -0.17 | -0.08 | 0.04      | -0.68 | -0.60 |
|                                     |                   | T-B3 <sup>b</sup>   | 1.85   | -0.19 | -0.19 | -0.01 | 0.04      | -0.52 | -0.50 |
| $^2\text{TS}_{\text{H}}(\text{IV})$ | Ethane            | G-B1 <sup>a</sup>   | 1.78   | -0.07 | -0.16 | -0.06 | 0.03      | -0.54 | -0.52 |
| $^2\text{TS}_{\text{H}}(\text{IV})$ | <i>i</i> -propane | G-B1 <sup>a</sup>   | 1.75   | -0.11 | -0.18 | -0.07 | 0.03      | -0.41 | -0.41 |
|                                     |                   | T-B3 <sup>b</sup>   | 1.80   | -0.26 | -0.22 | 0.00  | 0.02      | -0.31 | -0.34 |
|                                     | Alkane            | Level               | $Q$    |       |       |       |           |       |       |
|                                     |                   |                     | Fe     | O     | Por   | SH    | substrate |       |       |
|                                     |                   |                     |        |       |       |       | H         | C     | sub-H |
| $^2\text{TS}_{\text{H}}(\text{IV})$ | Methane           | G-B1 <sup>a,c</sup> | 1.00   | -0.63 | -0.50 | -0.24 | 0.39      | -0.72 | -0.02 |
|                                     |                   | T-B3 <sup>b,d</sup> | 1.02   | -0.61 | -0.52 | -0.18 | 0.31      | -0.64 | -0.03 |
| $^2\text{TS}_{\text{H}}(\text{IV})$ | Ethane            | G-B1 <sup>a,c</sup> | 0.98   | -0.59 | -0.50 | -0.25 | 0.37      | -0.52 | -0.01 |
| $^2\text{TS}_{\text{H}}(\text{IV})$ | <i>i</i> -propane | G-B1 <sup>a,c</sup> | 0.85   | -0.51 | -0.39 | -0.20 | 0.35      | -0.36 | -0.10 |
|                                     |                   | T-B3 <sup>b,d</sup> | 1.01   | -0.56 | -0.50 | -0.20 | 0.29      | -0.27 | -0.05 |

<sup>a</sup>G-B1: B3LYP/LACVP optimization by Gaussian 09. <sup>b</sup>T-B3: B3LYP/def2-TZVP optimization by Turbomole 6.3.1. <sup>c</sup>Charges are calculated by NBO 5.0 embedded in Jaguar 7.8. <sup>d</sup>Charges are calculated by NBO embedded in Turbomole 6.3.1.



### Cartesian Coordinates of the QM Region of the Optimized Species from QM/MM calculation

|                   |           |           |           |                                    |           |           |           |
|-------------------|-----------|-----------|-----------|------------------------------------|-----------|-----------|-----------|
| Methane reaction: |           |           |           | h                                  | -1.386116 | -5.230006 | -0.994647 |
| <sup>2</sup> RC   |           |           |           | h                                  | -4.834118 | -1.978584 | 1.208578  |
| S                 | 0.507907  | -1.773096 | 3.840765  | h                                  | -4.659537 | 0.329950  | 2.835481  |
| O                 | 0.155013  | -0.059389 | 0.008469  | h                                  | -0.713566 | 3.277228  | 4.548410  |
| Fe                | 0.307372  | -0.858906 | 1.449608  | h                                  | 2.034994  | 3.509789  | 3.896785  |
| N                 | 0.209296  | -2.701282 | 0.572645  | h                                  | 5.383087  | 0.473544  | 1.141194  |
| N                 | -1.700788 | -0.890944 | 1.754180  | h                                  | 5.325935  | -2.104415 | 0.245341  |
| N                 | 0.456629  | 0.849110  | 2.540889  |                                    |           |           |           |
| N                 | 2.328503  | -0.941510 | 1.296321  | <sup>2</sup> TS <sub>H</sub> (III) |           |           |           |
| C                 | 1.254151  | -3.481658 | 0.089707  | S                                  | 0.516583  | -1.759926 | 3.779311  |
| C                 | 0.738524  | -4.662784 | -0.599799 | O                                  | 0.234851  | 0.076076  | -0.072590 |
| C                 | -0.636304 | -4.573791 | -0.552798 | Fe                                 | 0.294720  | -0.890081 | 1.441014  |
| C                 | -0.952091 | -3.358967 | 0.189835  | N                                  | 0.173744  | -2.696398 | 0.497628  |
| C                 | -2.602693 | -1.792126 | 1.225214  | N                                  | -1.718333 | -0.904294 | 1.693187  |
| C                 | -3.972666 | -1.422446 | 1.578276  | N                                  | 0.455665  | 0.848305  | 2.501738  |
| C                 | -3.891781 | -0.289593 | 2.372034  | N                                  | 2.318654  | -0.955972 | 1.274977  |
| C                 | -2.453451 | 0.026187  | 2.463327  | C                                  | 1.222378  | -3.475785 | 0.020744  |
| C                 | -0.557053 | 1.474048  | 3.234368  | C                                  | 0.712844  | -4.669536 | -0.652761 |
| C                 | -0.055694 | 2.650534  | 3.946310  | C                                  | -0.663024 | -4.598214 | -0.589755 |
| C                 | 1.286680  | 2.761001  | 3.637150  | C                                  | -0.985007 | -3.381570 | 0.146609  |
| C                 | 1.587168  | 1.618774  | 2.753498  | C                                  | -2.629497 | -1.816724 | 1.192988  |
| C                 | 3.190769  | 0.108036  | 1.561781  | C                                  | -3.992718 | -1.443385 | 1.560818  |
| C                 | 4.542430  | -0.220071 | 1.125071  | C                                  | -3.901085 | -0.299782 | 2.340213  |
| C                 | 4.502913  | -1.511419 | 0.644162  | C                                  | -2.461213 | 0.018714  | 2.406442  |
| C                 | 3.109392  | -1.941816 | 0.722633  | C                                  | -0.562210 | 1.475108  | 3.183395  |
| C                 | 2.598986  | -3.126743 | 0.197996  | C                                  | -0.063916 | 2.647958  | 3.909588  |
| H                 | 3.320153  | -3.818083 | -0.224628 | C                                  | 1.282251  | 2.750616  | 3.619338  |
| C                 | -2.237319 | -2.923867 | 0.494670  | C                                  | 1.585871  | 1.606121  | 2.735025  |
| H                 | -3.044499 | -3.562101 | 0.149889  | C                                  | 3.186796  | 0.083619  | 1.552892  |
| C                 | -1.889902 | 1.077761  | 3.185362  | C                                  | 4.537945  | -0.248623 | 1.113256  |
| H                 | -2.580673 | 1.684942  | 3.757496  | C                                  | 4.489127  | -1.532162 | 0.614452  |
| C                 | 2.833551  | 1.274829  | 2.236112  | C                                  | 3.090186  | -1.952162 | 0.685046  |
| H                 | 3.648994  | 1.964041  | 2.432405  | C                                  | 2.569314  | -3.123607 | 0.139980  |
| C                 | -1.212829 | -0.580302 | -2.902047 | H                                  | 3.288740  | -3.816167 | -0.284564 |
| H                 | -0.754539 | -0.283401 | -1.956275 | C                                  | -2.269726 | -2.959658 | 0.476325  |
| H                 | -0.563334 | -0.285889 | -3.732305 | H                                  | -3.077727 | -3.613910 | 0.163067  |
| H                 | -1.350036 | -1.666796 | -2.913212 | C                                  | -1.893088 | 1.074868  | 3.124734  |
| H                 | -2.183131 | -0.087890 | -3.022012 | H                                  | -2.584794 | 1.678356  | 3.700633  |
| h                 | 0.634628  | -3.146010 | 3.782477  | C                                  | 2.835764  | 1.249375  | 2.233383  |
| h                 | 1.330639  | -5.437857 | -1.086346 | H                                  | 3.656509  | 1.928898  | 2.442649  |

|                      |           |           |           |                                   |           |           |           |
|----------------------|-----------|-----------|-----------|-----------------------------------|-----------|-----------|-----------|
| C                    | -1.081197 | -0.596867 | -2.187152 | H                                 | -2.569119 | 1.688383  | 3.721661  |
| H                    | -0.342520 | -0.296344 | -0.910026 | C                                 | 2.848507  | 1.267471  | 2.244502  |
| H                    | -0.361303 | -0.237305 | -2.919094 | H                                 | 3.667665  | 1.951653  | 2.444659  |
| H                    | -1.231249 | -1.672398 | -2.137560 | C                                 | -1.224383 | -0.635555 | -2.641540 |
| H                    | -1.963105 | 0.025402  | -2.056730 | H                                 | -0.317581 | -0.395374 | -0.762601 |
| h                    | 0.635121  | -3.133694 | 3.724023  | H                                 | -0.368107 | -0.259124 | -3.188126 |
| h                    | 1.310025  | -5.446234 | -1.130446 | H                                 | -1.367276 | -1.702952 | -2.518480 |
| h                    | -1.409204 | -5.268895 | -1.015746 | H                                 | -1.996109 | 0.058270  | -2.331967 |
| h                    | -4.859419 | -2.004922 | 1.212147  | h                                 | 0.633924  | -3.137249 | 3.745613  |
| h                    | -4.663136 | 0.318323  | 2.814862  | h                                 | 1.327009  | -5.433676 | -1.118493 |
| h                    | -0.725423 | 3.271099  | 4.511394  | h                                 | -1.392209 | -5.248477 | -1.012990 |
| h                    | 2.034275  | 3.491502  | 3.890658  | h                                 | -4.842630 | -1.985857 | 1.214333  |
| h                    | 5.385320  | 0.436430  | 1.140152  | h                                 | -4.648713 | 0.330080  | 2.829044  |
| h                    | 5.310111  | -2.127943 | 0.215583  | h                                 | -0.711864 | 3.283880  | 4.529616  |
|                      |           |           |           | h                                 | 2.045903  | 3.512008  | 3.899981  |
|                      |           |           |           | h                                 | 5.394879  | 0.459669  | 1.140104  |
| <sup>2</sup> IC(III) |           |           |           | h                                 | 5.325088  | -2.111895 | 0.230065  |
| S                    | 0.518336  | -1.763407 | 3.805134  |                                   |           |           |           |
| O                    | 0.225003  | 0.062016  | -0.075667 |                                   |           |           |           |
| Fe                   | 0.318977  | -0.881532 | 1.483605  | <sup>2</sup> TS <sub>H</sub> (IV) |           |           |           |
| N                    | 0.193415  | -2.687096 | 0.517312  | S                                 | 0.495545  | -1.759008 | 3.736324  |
| N                    | -1.700918 | -0.896479 | 1.720472  | O                                 | 0.227177  | 0.056350  | -0.035747 |
| N                    | 0.473269  | 0.856473  | 2.528034  | Fe                                | 0.308731  | -0.903733 | 1.448103  |
| N                    | 2.335737  | -0.943860 | 1.301412  | N                                 | 0.194590  | -2.691948 | 0.518906  |
| C                    | 1.240357  | -3.467044 | 0.041931  | N                                 | -1.709045 | -0.900597 | 1.700782  |
| C                    | 0.731122  | -4.656539 | -0.639908 | N                                 | 0.453899  | 0.828852  | 2.514940  |
| C                    | -0.645213 | -4.580052 | -0.584888 | N                                 | 2.327166  | -0.962668 | 1.265419  |
| C                    | -0.966137 | -3.364207 | 0.153589  | C                                 | 1.252821  | -3.480319 | 0.047165  |
| C                    | -2.611977 | -1.801882 | 1.206980  | C                                 | 0.732595  | -4.664363 | -0.623416 |
| C                    | -3.976609 | -1.427192 | 1.569251  | C                                 | -0.644679 | -4.584119 | -0.567613 |
| C                    | -3.885834 | -0.287719 | 2.355327  | C                                 | -0.972222 | -3.370719 | 0.164688  |
| C                    | -2.445196 | 0.025758  | 2.430876  | C                                 | -2.613645 | -1.816806 | 1.190510  |
| C                    | -0.545471 | 1.483009  | 3.208729  | C                                 | -3.976892 | -1.439495 | 1.552347  |
| C                    | -0.049121 | 2.660730  | 3.929183  | C                                 | -3.891391 | -0.299676 | 2.337439  |
| C                    | 1.295654  | 2.767201  | 3.634545  | C                                 | -2.454912 | 0.024871  | 2.417969  |
| C                    | 1.600585  | 1.620330  | 2.753377  | C                                 | -0.571315 | 1.461969  | 3.189677  |
| C                    | 3.200901  | 0.099106  | 1.566950  | C                                 | -0.065110 | 2.631421  | 3.906741  |
| C                    | 4.550978  | -0.229934 | 1.121510  | C                                 | 1.284073  | 2.727165  | 3.619176  |
| C                    | 4.504527  | -1.516731 | 0.630721  | C                                 | 1.591919  | 1.582276  | 2.742457  |
| C                    | 3.107061  | -1.941358 | 0.710796  | C                                 | 3.186116  | 0.086543  | 1.550512  |
| C                    | 2.587933  | -3.113981 | 0.166672  | C                                 | 4.535997  | -0.243635 | 1.108771  |
| H                    | 3.308608  | -3.805415 | -0.257730 | C                                 | 4.494557  | -1.529975 | 0.615367  |
| C                    | -2.251181 | -2.938378 | 0.479551  | C                                 | 3.100947  | -1.960372 | 0.684618  |
| H                    | -3.059996 | -3.586155 | 0.154500  | C                                 | 2.596353  | -3.144525 | 0.159237  |
| C                    | -1.876421 | 1.082108  | 3.149998  | H                                 | 3.315336  | -3.841015 | -0.256149 |

|                     |           |           |           |                |           |           |           |
|---------------------|-----------|-----------|-----------|----------------|-----------|-----------|-----------|
| C                   | -2.260966 | -2.956819 | 0.475582  | C              | 3.111619  | -1.953129 | 0.717167  |
| H                   | -3.064976 | -3.610870 | 0.156212  | C              | 2.608491  | -3.136706 | 0.189711  |
| C                   | -1.903245 | 1.080406  | 3.134835  | H              | 3.328010  | -3.835152 | -0.221261 |
| H                   | -2.593825 | 1.689959  | 3.703445  | C              | -2.249403 | -2.924511 | 0.473021  |
| C                   | 2.844052  | 1.241555  | 2.241995  | H              | -3.053396 | -3.573130 | 0.142971  |
| H                   | 3.662637  | 1.919988  | 2.457266  | C              | -1.895978 | 1.091404  | 3.164499  |
| C                   | -1.052009 | -0.578220 | -2.127836 | H              | -2.587170 | 1.702359  | 3.730495  |
| H                   | -0.367626 | -0.271330 | -0.935811 | C              | 2.851667  | 1.256991  | 2.258547  |
| H                   | -0.340633 | -0.255127 | -2.885760 | H              | 3.668572  | 1.939537  | 2.466801  |
| H                   | -1.211179 | -1.650207 | -2.038875 | C              | -1.212535 | -0.624280 | -2.588597 |
| H                   | -1.936677 | 0.047557  | -2.030633 | H              | -0.308556 | -0.352913 | -0.775829 |
| h                   | 0.625641  | -3.131978 | 3.687581  | H              | -0.373671 | -0.271238 | -3.177541 |
| h                   | 1.324894  | -5.442761 | -1.104400 | H              | -1.356660 | -1.686907 | -2.428381 |
| h                   | -1.389913 | -5.252161 | -0.999367 | H              | -1.995396 | 0.075620  | -2.321825 |
| h                   | -4.841908 | -1.998915 | 1.196167  | h              | 0.627605  | -3.144200 | 3.697306  |
| h                   | -4.657634 | 0.312519  | 2.812997  | h              | 1.332029  | -5.426346 | -1.090149 |
| h                   | -0.724067 | 3.263365  | 4.502131  | h              | -1.381068 | -5.222830 | -0.997403 |
| h                   | 2.034402  | 3.470298  | 3.889041  | h              | -4.830484 | -1.976125 | 1.200191  |
| h                   | 5.379656  | 0.446143  | 1.131427  | h              | -4.651769 | 0.328715  | 2.826982  |
| h                   | 5.318665  | -2.123412 | 0.219455  | h              | -0.715140 | 3.274585  | 4.525161  |
|                     |           |           |           | h              | 2.039417  | 3.489100  | 3.897655  |
|                     |           |           |           | h              | 5.384416  | 0.463745  | 1.139835  |
|                     |           |           |           | h              | 5.325961  | -2.111757 | 0.238656  |
| <sup>2</sup> IC(IV) |           |           |           |                |           |           |           |
| S                   | 0.492988  | -1.771864 | 3.751317  |                |           |           |           |
| O                   | 0.228404  | 0.046704  | -0.043778 |                |           |           |           |
| Fe                  | 0.325531  | -0.888045 | 1.488763  | <sup>2</sup> P |           |           |           |
| N                   | 0.207548  | -2.673771 | 0.534311  | S              | 0.461851  | -1.774505 | 3.763188  |
| N                   | -1.699473 | -0.881196 | 1.722623  | O              | 0.022690  | 0.280517  | -0.124499 |
| N                   | 0.463913  | 0.833556  | 2.547816  | Fe             | 0.278562  | -0.918397 | 1.604256  |
| N                   | 2.339150  | -0.954178 | 1.299567  | N              | 0.156792  | -2.655152 | 0.532374  |
| C                   | 1.264408  | -3.466748 | 0.068288  | N              | -1.750341 | -0.839051 | 1.760951  |
| C                   | 0.742767  | -4.645603 | -0.609237 | N              | 0.386558  | 0.893339  | 2.535250  |
| C                   | -0.634825 | -4.556707 | -0.564426 | N              | 2.261140  | -0.920252 | 1.267962  |
| C                   | -0.960439 | -3.342405 | 0.167280  | C              | 1.200790  | -3.448793 | 0.056704  |
| C                   | -2.602347 | -1.792246 | 1.199586  | C              | 0.674616  | -4.633571 | -0.619836 |
| C                   | -3.966869 | -1.416793 | 1.559892  | C              | -0.699518 | -4.543292 | -0.558872 |
| C                   | -3.883713 | -0.281975 | 2.352415  | C              | -1.011771 | -3.323187 | 0.183120  |
| C                   | -2.447409 | 0.040732  | 2.440962  | C              | -2.649398 | -1.758998 | 1.238193  |
| C                   | -0.562722 | 1.468253  | 3.221472  | C              | -4.017017 | -1.389446 | 1.593138  |
| C                   | -0.056541 | 2.641146  | 3.930965  | C              | -3.942421 | -0.251826 | 2.387073  |
| C                   | 1.291662  | 2.740308  | 3.636427  | C              | -2.508612 | 0.075243  | 2.480843  |
| C                   | 1.600234  | 1.593388  | 2.763819  | C              | -0.625571 | 1.519344  | 3.249407  |
| C                   | 3.195057  | 0.098764  | 1.572783  | C              | -0.103414 | 2.671037  | 3.982418  |
| C                   | 4.543548  | -0.229648 | 1.125227  | C              | 1.245060  | 2.759643  | 3.686685  |
| C                   | 4.503600  | -1.518913 | 0.639062  | C              | 1.536752  | 1.628150  | 2.785021  |

|                 |           |           |           |                                              |           |           |           |
|-----------------|-----------|-----------|-----------|----------------------------------------------|-----------|-----------|-----------|
| C               | 3.125525  | 0.120548  | 1.573700  | C                                            | -0.055859 | 2.650234  | 3.946970  |
| C               | 4.480333  | -0.211232 | 1.141824  | C                                            | 1.286432  | 2.761013  | 3.637454  |
| C               | 4.440847  | -1.496000 | 0.641211  | C                                            | 1.586777  | 1.618569  | 2.753926  |
| C               | 3.045078  | -1.922207 | 0.696086  | C                                            | 3.190180  | 0.107229  | 1.563188  |
| C               | 2.545598  | -3.109369 | 0.169877  | C                                            | 4.541573  | -0.220529 | 1.125787  |
| H               | 3.268001  | -3.806380 | -0.240373 | C                                            | 4.502519  | -1.511847 | 0.645202  |
| C               | -2.294056 | -2.893311 | 0.506988  | C                                            | 3.109325  | -1.943234 | 0.725202  |
| H               | -3.104078 | -3.538570 | 0.183070  | C                                            | 2.599165  | -3.127916 | 0.200030  |
| C               | -1.957867 | 1.134790  | 3.201111  | H                                            | 3.320391  | -3.819157 | -0.222692 |
| H               | -2.649607 | 1.739368  | 3.774437  | C                                            | -2.237522 | -2.923393 | 0.494358  |
| C               | 2.785246  | 1.273211  | 2.278502  | H                                            | -3.044854 | -3.562443 | 0.150891  |
| H               | 3.611866  | 1.938278  | 2.507587  | C                                            | -1.889983 | 1.077436  | 3.185596  |
| C               | -0.705350 | -0.094055 | -1.340213 | H                                            | -2.580782 | 1.684224  | 3.758237  |
| H               | -0.325157 | 1.098667  | 0.288299  | C                                            | 2.833220  | 1.274325  | 2.236455  |
| H               | -0.455049 | 0.603836  | -2.144245 | H                                            | 3.648695  | 1.963698  | 2.432254  |
| H               | -0.360547 | -1.095890 | -1.587161 | C                                            | -1.212648 | -0.581823 | -2.898886 |
| H               | -1.783200 | -0.108441 | -1.157261 | H                                            | -0.754680 | -0.286693 | -1.952667 |
| h               | 0.613380  | -3.144283 | 3.691809  | H                                            | -0.563580 | -0.286151 | -3.728548 |
| h               | 1.266728  | -5.414659 | -1.096671 | H                                            | -1.348852 | -1.668137 | -2.911710 |
| h               | -1.450432 | -5.207092 | -0.987316 | H                                            | -2.183500 | -0.090674 | -3.017754 |
| h               | -4.878697 | -1.951241 | 1.232639  | h                                            | 0.636750  | -3.141790 | 3.778131  |
| h               | -4.712485 | 0.353379  | 2.865399  | h                                            | 1.330893  | -5.437600 | -1.086400 |
| h               | -0.748787 | 3.292604  | 4.603075  | h                                            | -1.385634 | -5.229423 | -0.995023 |
| h               | 2.006169  | 3.487332  | 3.968194  | h                                            | -4.834372 | -1.978097 | 1.207536  |
| h               | 5.327838  | 0.473559  | 1.171186  | h                                            | -4.659803 | 0.330271  | 2.835006  |
| h               | 5.266292  | -2.085080 | 0.241594  | h                                            | -0.713601 | 3.277026  | 4.549111  |
|                 |           |           |           | h                                            | 2.034843  | 3.509847  | 3.896675  |
| <sup>4</sup> RC |           |           |           | h                                            | 5.381867  | 0.473545  | 1.141038  |
| S               | 0.512911  | -1.768451 | 3.832445  | h                                            | 5.325650  | -2.104582 | 0.246220  |
| O               | 0.156096  | -0.064780 | 0.016219  |                                              |           |           |           |
| Fe              | 0.310936  | -0.864021 | 1.458497  | <sup>4</sup> T <sub>S<sub>H</sub>(III)</sub> |           |           |           |
| N               | 0.209666  | -2.700639 | 0.571716  | S                                            | 0.525982  | -1.751749 | 3.766045  |
| N               | -1.701116 | -0.890187 | 1.752773  | O                                            | 0.185534  | 0.066142  | -0.089116 |
| N               | 0.456675  | 0.849290  | 2.541307  | Fe                                           | 0.308854  | -0.871704 | 1.437095  |
| N               | 2.328091  | -0.943475 | 1.299341  | N                                            | 0.187080  | -2.688703 | 0.496335  |
| C               | 1.254416  | -3.481911 | 0.090610  | N                                            | -1.711660 | -0.897624 | 1.703457  |
| C               | 0.738840  | -4.662407 | -0.599967 | N                                            | 0.459982  | 0.864018  | 2.490403  |
| C               | -0.635863 | -4.573215 | -0.553093 | N                                            | 2.322706  | -0.934792 | 1.258392  |
| C               | -0.952129 | -3.358302 | 0.189217  | C                                            | 1.233201  | -3.465820 | 0.016826  |
| C               | -2.602958 | -1.791449 | 1.223751  | C                                            | 0.724218  | -4.660572 | -0.655370 |
| C               | -3.972925 | -1.421894 | 1.577151  | C                                            | -0.651876 | -4.590175 | -0.588499 |
| C               | -3.892232 | -0.289238 | 2.371205  | C                                            | -0.971603 | -3.372624 | 0.148343  |
| C               | -2.453678 | 0.026433  | 2.462599  | C                                            | -2.619431 | -1.810383 | 1.199697  |
| C               | -0.557065 | 1.473446  | 3.235646  | C                                            | -3.984460 | -1.439305 | 1.564932  |

|                      |           |           |           |                     |           |           |           |
|----------------------|-----------|-----------|-----------|---------------------|-----------|-----------|-----------|
| C                    | -3.895604 | -0.294462 | 2.343219  | C                   | -0.960078 | -3.358142 | 0.152998  |
| C                    | -2.456191 | 0.025188  | 2.411018  | C                   | -2.606875 | -1.797653 | 1.210901  |
| C                    | -0.557699 | 1.485756  | 3.180481  | C                   | -3.972302 | -1.422826 | 1.570385  |
| C                    | -0.058022 | 2.655740  | 3.910309  | C                   | -3.881976 | -0.284683 | 2.358999  |
| C                    | 1.286829  | 2.762001  | 3.616129  | C                   | -2.441121 | 0.026997  | 2.438059  |
| C                    | 1.588985  | 1.622805  | 2.724640  | C                   | -0.541831 | 1.488408  | 3.210029  |
| C                    | 3.190573  | 0.104565  | 1.536313  | C                   | -0.045441 | 2.666477  | 3.930472  |
| C                    | 4.542959  | -0.229609 | 1.103278  | C                   | 1.298647  | 2.774269  | 3.633581  |
| C                    | 4.496071  | -1.515477 | 0.609749  | C                   | 1.602731  | 1.627611  | 2.751364  |
| C                    | 3.097326  | -1.935617 | 0.676244  | C                   | 3.203583  | 0.106335  | 1.563808  |
| C                    | 2.580277  | -3.109798 | 0.134765  | C                   | 4.553799  | -0.223788 | 1.120270  |
| H                    | 3.301726  | -3.801675 | -0.287377 | C                   | 4.508260  | -1.511582 | 0.631793  |
| C                    | -2.256635 | -2.951112 | 0.480470  | C                   | 3.111245  | -1.936745 | 0.711222  |
| H                    | -3.064047 | -3.605257 | 0.165286  | C                   | 2.593129  | -3.110727 | 0.168195  |
| C                    | -1.887834 | 1.084892  | 3.125732  | H                   | 3.314260  | -3.802738 | -0.254514 |
| H                    | -2.579271 | 1.688391  | 3.701944  | C                   | -2.245240 | -2.931108 | 0.478806  |
| C                    | 2.837868  | 1.270686  | 2.216337  | H                   | -3.054067 | -3.576497 | 0.149632  |
| H                    | 3.657550  | 1.951949  | 2.423858  | C                   | -1.872049 | 1.085811  | 3.154433  |
| C                    | -1.083315 | -0.657192 | -2.218983 | H                   | -2.564437 | 1.691889  | 3.726782  |
| H                    | -0.370543 | -0.333572 | -0.934088 | C                   | 2.850786  | 1.275249  | 2.239885  |
| H                    | -0.388527 | -0.216128 | -2.930901 | H                   | 3.669608  | 1.960279  | 2.439031  |
| H                    | -1.152272 | -1.742019 | -2.216861 | C                   | -1.209622 | -0.680306 | -2.674328 |
| H                    | -2.014433 | -0.112771 | -2.081699 | H                   | -0.309867 | -0.418314 | -0.759042 |
| h                    | 0.637341  | -3.126311 | 3.715799  | H                   | -0.347339 | -0.264454 | -3.181627 |
| h                    | 1.321163  | -5.437207 | -1.133451 | H                   | -1.326085 | -1.754219 | -2.585465 |
| h                    | -1.398498 | -5.262222 | -1.011555 | H                   | -2.008470 | -0.017467 | -2.366021 |
| h                    | -4.849869 | -2.002171 | 1.215196  | h                   | 0.638428  | -3.132629 | 3.741189  |
| h                    | -4.658731 | 0.324080  | 2.815562  | h                   | 1.330973  | -5.431261 | -1.117122 |
| h                    | -0.718093 | 3.275752  | 4.516905  | h                   | -1.387935 | -5.243678 | -1.012046 |
| h                    | 2.038766  | 3.502293  | 3.889303  | h                   | -4.838046 | -1.980312 | 1.212946  |
| h                    | 5.390479  | 0.455199  | 1.131822  | h                   | -4.645087 | 0.333292  | 2.832112  |
| h                    | 5.318396  | -2.112052 | 0.214848  | h                   | -0.707813 | 3.288531  | 4.532451  |
|                      |           |           |           | h                   | 2.048958  | 3.519297  | 3.898219  |
|                      |           |           |           | h                   | 5.397670  | 0.465865  | 1.138347  |
|                      |           |           |           | h                   | 5.329312  | -2.106751 | 0.232150  |
| <sup>4</sup> IC(III) |           |           |           | <sup>4</sup> IC(IV) |           |           |           |
| S                    | 0.529355  | -1.758073 | 3.796365  | S                   | 0.490932  | -1.775268 | 3.755990  |
| O                    | 0.200546  | 0.062711  | -0.064086 | O                   | 0.219330  | 0.025796  | -0.049046 |
| Fe                   | 0.326733  | -0.880216 | 1.488371  | Fe                  | 0.333145  | -0.884685 | 1.502912  |
| N                    | 0.199690  | -2.683389 | 0.517789  | N                   | 0.214291  | -2.675403 | 0.545268  |
| N                    | -1.696947 | -0.896450 | 1.731220  | N                   | -1.695368 | -0.879723 | 1.733093  |
| N                    | 0.477034  | 0.863009  | 2.527390  | N                   | 0.468383  | 0.836610  | 2.548155  |
| N                    | 2.338744  | -0.938105 | 1.298981  | N                   | 2.343838  | -0.948713 | 1.305723  |
| C                    | 1.245682  | -3.464325 | 0.043274  |                     |           |           |           |
| C                    | 0.735639  | -4.653635 | -0.638642 |                     |           |           |           |
| C                    | -0.640676 | -4.575194 | -0.584496 |                     |           |           |           |

|                         |           |           |           |                |           |           |           |
|-------------------------|-----------|-----------|-----------|----------------|-----------|-----------|-----------|
| C                       | 1.270200  | -3.466033 | 0.076972  | N              | -1.751338 | -0.871499 | 1.730923  |
| C                       | 0.749017  | -4.643530 | -0.603826 | N              | 0.396908  | 0.882171  | 2.461975  |
| C                       | -0.628628 | -4.554309 | -0.558718 | N              | 2.277107  | -0.938620 | 1.227411  |
| C                       | -0.953666 | -3.341565 | 0.176291  | C              | 1.200939  | -3.483106 | 0.038770  |
| C                       | -2.596853 | -1.790212 | 1.207109  | C              | 0.679053  | -4.668870 | -0.644734 |
| C                       | -3.962519 | -1.414282 | 1.564234  | C              | -0.694161 | -4.566742 | -0.606035 |
| C                       | -3.880647 | -0.279659 | 2.357035  | C              | -1.002475 | -3.337840 | 0.125781  |
| C                       | -2.444040 | 0.042391  | 2.447950  | C              | -2.649484 | -1.767816 | 1.188942  |
| C                       | -0.559242 | 1.471010  | 3.224011  | C              | -4.018660 | -1.410371 | 1.557259  |
| C                       | -0.053044 | 2.644074  | 3.931690  | C              | -3.939219 | -0.289037 | 2.372464  |
| C                       | 1.294737  | 2.745236  | 3.634527  | C              | -2.502729 | 0.029461  | 2.461640  |
| C                       | 1.604144  | 1.599561  | 2.762443  | C              | -0.599651 | 1.487817  | 3.203803  |
| C                       | 3.199608  | 0.105368  | 1.573566  | C              | -0.082504 | 2.649768  | 3.927067  |
| C                       | 4.547390  | -0.223456 | 1.124755  | C              | 1.253450  | 2.766291  | 3.590148  |
| C                       | 4.507541  | -1.513952 | 0.642061  | C              | 1.534438  | 1.640250  | 2.677655  |
| C                       | 3.116159  | -1.949217 | 0.723327  | C              | 3.140247  | 0.110818  | 1.494852  |
| C                       | 2.614345  | -3.133703 | 0.197556  | C              | 4.497888  | -0.228498 | 1.080958  |
| H                       | 3.334372  | -3.831136 | -0.214233 | C              | 4.459014  | -1.523993 | 0.609744  |
| C                       | -2.242852 | -2.922200 | 0.480654  | C              | 3.061593  | -1.947657 | 0.674791  |
| H                       | -3.046800 | -3.569360 | 0.147593  | C              | 2.548881  | -3.135815 | 0.156521  |
| C                       | -1.892201 | 1.094259  | 3.169674  | H              | 3.269887  | -3.836038 | -0.252962 |
| H                       | -2.582874 | 1.706067  | 3.735329  | C              | -2.282898 | -2.893737 | 0.441812  |
| C                       | 2.855651  | 1.265146  | 2.256422  | H              | -3.094723 | -3.530488 | 0.102902  |
| H                       | 3.671652  | 1.949384  | 2.462460  | C              | -1.930655 | 1.080048  | 3.183651  |
| C                       | -1.216674 | -0.646103 | -2.660248 | H              | -2.613884 | 1.676400  | 3.776593  |
| H                       | -0.305637 | -0.409006 | -0.763513 | C              | 2.781091  | 1.282859  | 2.161217  |
| H                       | -0.374925 | -0.264609 | -3.226486 | H              | 3.600919  | 1.964524  | 2.367234  |
| H                       | -1.331877 | -1.712929 | -2.504364 | C              | -0.674906 | 0.308387  | -2.391553 |
| H                       | -2.011902 | 0.033414  | -2.378945 | H              | -0.415868 | 0.864319  | -0.010825 |
| h                       | 0.625606  | -3.147634 | 3.702881  | H              | 0.238011  | 0.753007  | -2.765936 |
| h                       | 1.338049  | -5.423624 | -1.086071 | H              | -0.828209 | -0.755625 | -2.501366 |
| h                       | -1.375009 | -5.219093 | -0.993509 | H              | -1.528754 | 0.944303  | -2.186199 |
| h                       | -4.825786 | -1.972796 | 1.202436  | h              | 0.635944  | -3.143305 | 3.758734  |
| h                       | -4.648860 | 0.331749  | 2.830423  | h              | 1.272748  | -5.451625 | -1.116843 |
| h                       | -0.711174 | 3.277169  | 4.526772  | h              | -1.446667 | -5.226122 | -1.038491 |
| h                       | 2.041281  | 3.495732  | 3.894323  | h              | -4.880791 | -1.966647 | 1.189354  |
| h                       | 5.387569  | 0.470820  | 1.136868  | h              | -4.704542 | 0.317443  | 2.856745  |
| h                       | 5.329667  | -2.107062 | 0.241566  | h              | -0.724639 | 3.262265  | 4.559980  |
|                         |           |           |           | h              | 2.008463  | 3.508680  | 3.848758  |
|                         |           |           |           | h              | 5.345169  | 0.456616  | 1.109226  |
|                         |           |           |           | h              | 5.284298  | -2.119223 | 0.219011  |
| <sup>4</sup> TSreb(III) |           |           |           |                |           |           |           |
| S                       | 0.506395  | -1.771166 | 3.827997  |                |           |           |           |
| O                       | -0.006735 | -0.003654 | -0.222075 |                |           |           |           |
| Fe                      | 0.263333  | -0.874907 | 1.440765  | <sup>4</sup> P |           |           |           |
| N                       | 0.163958  | -2.688870 | 0.504532  | S              | 0.446941  | -1.818105 | 3.968528  |

|    |           |           |           |                  |           |           |           |
|----|-----------|-----------|-----------|------------------|-----------|-----------|-----------|
| O  | -0.064903 | 0.495469  | -0.312345 |                  |           |           |           |
| Fe | 0.295102  | -0.955373 | 1.610870  | Ethane reaction: |           |           |           |
| N  | 0.168029  | -2.657587 | 0.526902  | <sup>2</sup> RC  |           |           |           |
| N  | -1.748218 | -0.861382 | 1.722545  | S                | 0.556137  | -1.737683 | 3.756505  |
| N  | 0.402455  | 0.880907  | 2.501791  | O                | 0.149766  | -0.030814 | -0.061812 |
| N  | 2.276714  | -0.915785 | 1.247782  | Fe               | 0.279930  | -0.799641 | 1.398258  |
| C  | 1.219972  | -3.453546 | 0.061969  | N                | 0.193132  | -2.652899 | 0.571907  |
| C  | 0.698448  | -4.637276 | -0.609525 | N                | -1.744316 | -0.834633 | 1.672789  |
| C  | -0.678831 | -4.545929 | -0.565274 | N                | 0.399949  | 0.921774  | 2.469050  |
| C  | -1.001661 | -3.326549 | 0.161444  | N                | 2.314006  | -0.874072 | 1.286916  |
| C  | -2.650387 | -1.771165 | 1.194708  | C                | 1.248412  | -3.417906 | 0.091279  |
| C  | -4.016158 | -1.400503 | 1.551944  | C                | 0.752322  | -4.644122 | -0.519080 |
| C  | -3.936739 | -0.268029 | 2.352349  | C                | -0.620964 | -4.610994 | -0.418991 |
| C  | -2.501351 | 0.054580  | 2.445690  | C                | -0.955835 | -3.371348 | 0.266936  |
| C  | -0.615480 | 1.495365  | 3.219327  | C                | -2.634029 | -1.773651 | 1.189324  |
| C  | -0.100536 | 2.644541  | 3.956642  | C                | -4.012838 | -1.394271 | 1.491485  |
| C  | 1.248737  | 2.745597  | 3.658993  | C                | -3.951544 | -0.213920 | 2.213209  |
| C  | 1.547041  | 1.625327  | 2.752086  | C                | -2.517558 | 0.111868  | 2.318090  |
| C  | 3.139879  | 0.133115  | 1.539932  | C                | -0.639375 | 1.575358  | 3.096410  |
| C  | 4.492257  | -0.199146 | 1.109091  | C                | -0.161033 | 2.760115  | 3.805302  |
| C  | 4.455319  | -1.489130 | 0.621084  | C                | 1.199804  | 2.832964  | 3.585799  |
| C  | 3.062162  | -1.919849 | 0.683102  | C                | 1.531648  | 1.672337  | 2.738724  |
| C  | 2.564754  | -3.114833 | 0.175022  | C                | 3.189575  | 0.131244  | 1.659896  |
| H  | 3.286290  | -3.817469 | -0.225956 | C                | 4.558329  | -0.225952 | 1.300005  |
| C  | -2.289771 | -2.903762 | 0.466320  | C                | 4.505710  | -1.473617 | 0.712903  |
| H  | -3.093689 | -3.552683 | 0.135909  | C                | 3.097700  | -1.861664 | 0.698507  |
| C  | -1.947766 | 1.108043  | 3.170778  | C                | 2.588143  | -3.036277 | 0.159513  |
| H  | -2.637611 | 1.706017  | 3.752709  | H                | 3.315609  | -3.721897 | -0.260433 |
| C  | 2.798063  | 1.284298  | 2.241386  | C                | -2.249391 | -2.951347 | 0.552431  |
| H  | 3.620179  | 1.955414  | 2.467248  | H                | -3.043648 | -3.631464 | 0.261390  |
| C  | -0.893860 | 0.171853  | -1.468184 | C                | -1.971886 | 1.183778  | 3.022243  |
| H  | -0.435011 | 1.241101  | 0.204777  | H                | -2.672593 | 1.797319  | 3.575874  |
| H  | -0.882621 | 0.990105  | -2.196061 | C                | 2.806431  | 1.296964  | 2.320179  |
| H  | -0.447518 | -0.716276 | -1.913572 | H                | 3.612552  | 1.975810  | 2.576419  |
| H  | -1.923167 | -0.051564 | -1.170242 | C                | -1.300275 | -1.200801 | -2.802134 |
| h  | 0.601686  | -3.183609 | 3.842826  | H                | -0.543647 | -0.663985 | -2.221631 |
| h  | 1.291167  | -5.419060 | -1.084461 | H                | -2.068439 | -1.516967 | -2.085845 |
| h  | -1.424157 | -5.213991 | -0.996840 | H                | -1.763376 | -0.493030 | -3.501603 |
| h  | -4.877951 | -1.961888 | 1.191075  | C                | -0.699542 | -2.414021 | -3.527860 |
| h  | -4.704702 | 0.335551  | 2.836074  | H                | -1.462968 | -2.995481 | -4.061985 |
| h  | -0.746204 | 3.261473  | 4.581600  | H                | -0.207054 | -3.081435 | -2.814869 |
| h  | 2.004041  | 3.476966  | 3.946537  | H                | 0.051393  | -2.112804 | -4.268864 |
| h  | 5.338062  | 0.487737  | 1.138609  | h                | 0.718985  | -3.107262 | 3.710898  |
| h  | 5.280967  | -2.079850 | 0.224320  | h                | 1.352309  | -5.384168 | -1.048620 |

|                                        |           |           |           |                             |           |           |           |
|----------------------------------------|-----------|-----------|-----------|-----------------------------|-----------|-----------|-----------|
| h                                      | -1.355390 | -5.309618 | -0.819751 | C                           | -0.678436 | -2.069659 | -2.878611 |
| h                                      | -4.858858 | -1.985219 | 1.140635  | H                           | -1.287715 | -2.309193 | -3.767135 |
| h                                      | -4.727764 | 0.431090  | 2.624926  | H                           | -0.633357 | -2.977076 | -2.273491 |
| h                                      | -0.838194 | 3.426687  | 4.339344  | H                           | 0.335088  | -1.856911 | -3.232742 |
| h                                      | 1.943231  | 3.564959  | 3.901341  | h                           | 0.663530  | -3.134955 | 3.728271  |
| h                                      | 5.440199  | 0.396020  | 1.453383  | h                           | 1.144631  | -5.531319 | -1.007112 |
| h                                      | 5.324063  | -2.041876 | 0.270810  | h                           | -1.574657 | -5.380256 | -0.851593 |
|                                        |           |           |           | h                           | -4.996579 | -2.010001 | 1.241110  |
| ${}^2\text{TS}_{\text{H}}(\text{III})$ |           |           |           | h                           | -4.780713 | 0.450977  | 2.636630  |
| S                                      | 0.490454  | -1.766100 | 3.753305  | h                           | -0.821672 | 3.383902  | 4.269026  |
| O                                      | 0.139880  | -0.081615 | -0.160900 | h                           | 1.967458  | 3.443573  | 3.850521  |
| Fe                                     | 0.179409  | -0.936336 | 1.417804  | h                           | 5.336185  | 0.246837  | 1.243198  |
| N                                      | 0.021720  | -2.774773 | 0.582591  | h                           | 5.151794  | -2.230865 | 0.116912  |
| N                                      | -1.845054 | -0.909965 | 1.660785  |                             |           |           |           |
| N                                      | 0.358852  | 0.842939  | 2.407918  | ${}^2\text{IC}(\text{III})$ |           |           |           |
| N                                      | 2.209581  | -1.022207 | 1.262621  | S                           | 0.520812  | -1.748141 | 3.761022  |
| C                                      | 1.062888  | -3.571577 | 0.126056  | O                           | 0.131433  | -0.035591 | -0.153673 |
| C                                      | 0.543583  | -4.792955 | -0.476428 | Fe                          | 0.249377  | -0.892113 | 1.457315  |
| C                                      | -0.829997 | -4.725729 | -0.398665 | N                           | 0.123398  | -2.723635 | 0.568078  |
| C                                      | -1.141770 | -3.482942 | 0.294644  | N                           | -1.779827 | -0.900233 | 1.680139  |
| C                                      | -2.768939 | -1.845097 | 1.229447  | N                           | 0.391412  | 0.884554  | 2.438546  |
| C                                      | -4.129755 | -1.424627 | 1.547738  | N                           | 2.275927  | -0.951101 | 1.293152  |
| C                                      | -4.026624 | -0.220934 | 2.226810  | C                           | 1.176170  | -3.509041 | 0.120075  |
| C                                      | -2.583644 | 0.076684  | 2.291126  | C                           | 0.679101  | -4.741046 | -0.477831 |
| C                                      | -0.664391 | 1.524443  | 3.027358  | C                           | -0.696252 | -4.690499 | -0.407835 |
| C                                      | -0.158925 | 2.700761  | 3.737846  | C                           | -1.028043 | -3.444390 | 0.270257  |
| C                                      | 1.204621  | 2.734825  | 3.528303  | C                           | -2.687137 | -1.834542 | 1.210920  |
| C                                      | 1.508534  | 1.562522  | 2.682689  | C                           | -4.057207 | -1.431809 | 1.515287  |
| C                                      | 3.108358  | -0.021579 | 1.583028  | C                           | -3.976031 | -0.238440 | 2.215805  |
| C                                      | 4.457717  | -0.393292 | 1.161992  | C                           | -2.536612 | 0.070590  | 2.307864  |
| C                                      | 4.368975  | -1.652497 | 0.607577  | C                           | -0.643187 | 1.547420  | 3.059260  |
| C                                      | 2.957508  | -2.032099 | 0.668243  | C                           | -0.157757 | 2.731446  | 3.772497  |
| C                                      | 2.413376  | -3.216962 | 0.185225  | C                           | 1.204745  | 2.787592  | 3.565149  |
| H                                      | 3.114828  | -3.946968 | -0.205721 | C                           | 1.527936  | 1.620681  | 2.717564  |
| C                                      | -2.422135 | -3.044888 | 0.608567  | C                           | 3.158274  | 0.060567  | 1.620214  |
| H                                      | -3.230461 | -3.726618 | 0.363704  | C                           | 4.514756  | -0.288995 | 1.204205  |
| C                                      | -2.004573 | 1.156362  | 2.960313  | C                           | 4.447598  | -1.547670 | 0.644302  |
| H                                      | -2.689063 | 1.794108  | 3.507538  | C                           | 3.041920  | -1.946493 | 0.694914  |
| C                                      | 2.770018  | 1.153291  | 2.253984  | C                           | 2.520141  | -3.133471 | 0.192385  |
| H                                      | 3.604855  | 1.802315  | 2.503014  | H                           | 3.237470  | -3.843703 | -0.205425 |
| C                                      | -1.272274 | -0.912943 | -2.115176 | C                           | -2.318021 | -3.018096 | 0.571488  |
| H                                      | -0.431801 | -0.553494 | -0.999764 | H                           | -3.116690 | -3.702353 | 0.301041  |
| H                                      | -2.197753 | -1.125382 | -1.575656 | C                           | -1.976568 | 1.156645  | 2.986960  |
| H                                      | -1.277502 | 0.056372  | -2.619537 | H                           | -2.673190 | 1.782488  | 3.532860  |



|                                     |           |           |           |                            |           |           |           |
|-------------------------------------|-----------|-----------|-----------|----------------------------|-----------|-----------|-----------|
| C                                   | 2.796738  | 1.229320  | 2.292945  | C                          | 2.430176  | -3.242370 | 0.191569  |
| H                                   | 3.619723  | 1.890326  | 2.548867  | H                          | 3.129344  | -3.976021 | -0.193245 |
| C                                   | -1.251449 | -1.289166 | -2.798829 | C                          | -2.421595 | -3.042165 | 0.615325  |
| H                                   | -0.239312 | -0.636246 | -0.840902 | H                          | -3.227799 | -3.724492 | 0.370572  |
| H                                   | -2.039785 | -1.369607 | -2.055157 | C                          | -2.009106 | 1.171442  | 2.959280  |
| H                                   | -1.052469 | -0.300617 | -3.202949 | H                          | -2.690546 | 1.821661  | 3.493418  |
| C                                   | -0.683636 | -2.518037 | -3.428245 | C                          | 2.787133  | 1.120008  | 2.287725  |
| H                                   | -1.313189 | -2.888614 | -4.260076 | H                          | 3.623107  | 1.759924  | 2.551251  |
| H                                   | -0.604940 | -3.336038 | -2.705353 | C                          | -1.227974 | -0.888961 | -2.070647 |
| H                                   | 0.314641  | -2.345134 | -3.847410 | H                          | -0.455497 | -0.559130 | -1.033888 |
| h                                   | 0.678398  | -3.118671 | 3.726984  | H                          | -2.162361 | -1.100749 | -1.545647 |
| h                                   | 1.286995  | -5.477020 | -1.004018 | H                          | -1.243584 | 0.070344  | -2.595436 |
| h                                   | -1.431931 | -5.372635 | -0.833902 | C                          | -0.642050 | -2.053476 | -2.830817 |
| h                                   | -4.915210 | -2.018198 | 1.186587  | H                          | -1.269715 | -2.285732 | -3.707206 |
| h                                   | -4.742597 | 0.420331  | 2.623805  | H                          | -0.597011 | -2.957582 | -2.221443 |
| h                                   | -0.831839 | 3.403489  | 4.303570  | H                          | 0.366719  | -1.847093 | -3.200104 |
| h                                   | 1.956951  | 3.507330  | 3.887994  | h                          | 0.636038  | -3.135381 | 3.699666  |
| h                                   | 5.387045  | 0.358621  | 1.292364  | h                          | 1.141975  | -5.530991 | -0.990688 |
| h                                   | 5.239100  | -2.115023 | 0.154708  | h                          | -1.571267 | -5.360510 | -0.840786 |
|                                     |           |           |           | h                          | -4.984935 | -2.000669 | 1.239887  |
|                                     |           |           |           | h                          | -4.772554 | 0.455124  | 2.638622  |
| ${}^2\text{TS}_\text{H}(\text{IV})$ |           |           |           | h                          | -0.809941 | 3.381082  | 4.248930  |
| S                                   | 0.440249  | -1.769496 | 3.718923  | h                          | 1.983310  | 3.395252  | 3.880226  |
| O                                   | 0.134428  | -0.095959 | -0.110634 | h                          | 5.335053  | 0.234264  | 1.245743  |
| Fe                                  | 0.192365  | -0.952872 | 1.427520  | h                          | 5.154264  | -2.240322 | 0.111292  |
| N                                   | 0.034859  | -2.773983 | 0.601585  |                            |           |           |           |
| N                                   | -1.837418 | -0.903980 | 1.667996  | ${}^2\text{IC}(\text{IV})$ |           |           |           |
| N                                   | 0.363103  | 0.815120  | 2.427899  | S                          | 0.450451  | -1.769763 | 3.738852  |
| N                                   | 2.217339  | -1.039616 | 1.253503  | O                          | 0.116220  | -0.062842 | -0.108788 |
| C                                   | 1.082767  | -3.579629 | 0.144952  | Fe                         | 0.231239  | -0.902956 | 1.480288  |
| C                                   | 0.548681  | -4.789280 | -0.455961 | N                          | 0.076263  | -2.713227 | 0.600971  |
| C                                   | -0.826423 | -4.710811 | -0.381258 | N                          | -1.805781 | -0.863075 | 1.712237  |
| C                                   | -1.138526 | -3.473126 | 0.313692  | N                          | 0.392207  | 0.843206  | 2.476479  |
| C                                   | -2.757948 | -1.844663 | 1.233913  | N                          | 2.254255  | -0.999945 | 1.298612  |
| C                                   | -4.117379 | -1.417132 | 1.547941  | C                          | 1.124539  | -3.528939 | 0.158790  |
| C                                   | -4.016707 | -0.213448 | 2.226587  | C                          | 0.589667  | -4.736101 | -0.443753 |
| C                                   | -2.575680 | 0.088792  | 2.298930  | C                          | -0.786778 | -4.645961 | -0.386767 |
| C                                   | -0.666987 | 1.512278  | 3.029953  | C                          | -1.098758 | -3.403778 | 0.297803  |
| C                                   | -0.150538 | 2.681525  | 3.735244  | C                          | -2.721426 | -1.789759 | 1.241972  |
| C                                   | 1.218037  | 2.694449  | 3.546613  | C                          | -4.084701 | -1.365853 | 1.551116  |
| C                                   | 1.523487  | 1.520144  | 2.710161  | C                          | -3.989006 | -0.176716 | 2.254606  |
| C                                   | 3.111472  | -0.037915 | 1.592231  | C                          | -2.547641 | 0.120983  | 2.347334  |
| C                                   | 4.458171  | -0.408106 | 1.165085  | C                          | -0.640177 | 1.538238  | 3.083141  |
| C                                   | 4.370389  | -1.664079 | 0.602770  | C                          | -0.124270 | 2.708935  | 3.781519  |
| C                                   | 2.962297  | -2.049203 | 0.660949  |                            |           |           |           |

|                |           |           |           |                 |           |           |           |
|----------------|-----------|-----------|-----------|-----------------|-----------|-----------|-----------|
| C              | 1.244836  | 2.725414  | 3.588738  | C               | -2.778780 | -1.745506 | 1.271669  |
| C              | 1.552306  | 1.554420  | 2.752419  | C               | -4.142385 | -1.323857 | 1.581014  |
| C              | 3.145365  | 0.006433  | 1.628691  | C               | -4.048173 | -0.137132 | 2.294367  |
| C              | 4.491520  | -0.360030 | 1.197361  | C               | -2.606646 | 0.157677  | 2.389854  |
| C              | 4.407162  | -1.619567 | 0.642108  | C               | -0.696374 | 1.584154  | 3.122551  |
| C              | 3.000572  | -2.009309 | 0.704865  | C               | -0.164321 | 2.737501  | 3.837246  |
| C              | 2.472809  | -3.200497 | 0.225992  | C               | 1.205006  | 2.739509  | 3.641297  |
| H              | 3.173173  | -3.934987 | -0.154788 | C               | 1.495607  | 1.578816  | 2.780563  |
| C              | -2.382881 | -2.972293 | 0.597336  | C               | 3.075200  | 0.007999  | 1.639293  |
| H              | -3.189047 | -3.648245 | 0.335015  | C               | 4.429217  | -0.376719 | 1.241368  |
| C              | -1.982836 | 1.199092  | 3.015385  | C               | 4.339961  | -1.626392 | 0.662001  |
| H              | -2.663893 | 1.850215  | 3.548778  | C               | 2.923896  | -1.986476 | 0.674417  |
| C              | 2.816579  | 1.164517  | 2.321810  | C               | 2.387931  | -3.163537 | 0.167629  |
| H              | 3.648741  | 1.812060  | 2.578241  | H               | 3.086032  | -3.898033 | -0.218506 |
| C              | -1.234249 | -1.214641 | -2.656514 | C               | -2.445074 | -2.921586 | 0.603904  |
| H              | -0.194127 | -0.635967 | -0.855167 | H               | -3.258742 | -3.590419 | 0.343809  |
| H              | -2.050447 | -1.294648 | -1.943005 | C               | -2.038655 | 1.236755  | 3.063847  |
| H              | -1.018418 | -0.226157 | -3.054369 | H               | -2.717713 | 1.877771  | 3.613289  |
| C              | -0.689268 | -2.444423 | -3.302838 | C               | 2.754748  | 1.161097  | 2.351867  |
| H              | -1.303125 | -2.759504 | -4.167852 | H               | 3.598929  | 1.782343  | 2.635673  |
| H              | -0.674021 | -3.287127 | -2.605651 | C               | -0.702661 | 0.586371  | -1.524050 |
| H              | 0.330014  | -2.301240 | -3.680276 | H               | -0.259452 | 1.202103  | 0.386901  |
| h              | 0.646759  | -3.135169 | 3.700424  | H               | -1.516708 | 1.318504  | -1.455492 |
| h              | 1.181815  | -5.491350 | -0.960501 | H               | 0.078406  | 0.989982  | -2.180313 |
| h              | -1.531836 | -5.301142 | -0.838090 | C               | -1.218099 | -0.737594 | -2.059048 |
| h              | -4.950476 | -1.941856 | 1.224433  | H               | -1.598599 | -0.592877 | -3.078454 |
| h              | -4.747400 | 0.486763  | 2.670179  | H               | -2.024997 | -1.128188 | -1.434487 |
| h              | -0.784663 | 3.411611  | 4.289649  | H               | -0.424673 | -1.489815 | -2.085362 |
| h              | 2.007216  | 3.429495  | 3.922074  | h               | 0.643564  | -3.130168 | 3.671322  |
| h              | 5.366041  | 0.286331  | 1.271493  | h               | 1.082184  | -5.423690 | -1.072165 |
| h              | 5.189437  | -2.195693 | 0.147952  | h               | -1.629933 | -5.234059 | -0.910288 |
|                |           |           |           | h               | -5.007216 | -1.898930 | 1.250223  |
|                |           |           |           | h               | -4.805947 | 0.519591  | 2.721638  |
| <sup>2</sup> P |           |           |           | h               | -0.819166 | 3.437453  | 4.356199  |
| S              | 0.417867  | -1.770734 | 3.744439  | h               | 1.980558  | 3.424443  | 3.984006  |
| O              | -0.116778 | 0.415229  | -0.180925 | h               | 5.315752  | 0.249936  | 1.338460  |
| Fe             | 0.170825  | -0.933558 | 1.578800  | h               | 5.125440  | -2.202465 | 0.172890  |
| N              | 0.005291  | -2.671974 | 0.563841  |                 |           |           |           |
| N              | -1.861012 | -0.820563 | 1.745913  | <sup>4</sup> RC |           |           |           |
| N              | 0.322586  | 0.896557  | 2.473477  | S               | 0.555122  | -1.735778 | 3.750735  |
| N              | 2.169429  | -0.971725 | 1.257416  | O               | 0.142503  | -0.035606 | -0.054840 |
| C              | 1.036125  | -3.479367 | 0.086503  | Fe              | 0.284629  | -0.805572 | 1.406215  |
| C              | 0.491762  | -4.673066 | -0.546778 | N               | 0.193916  | -2.652041 | 0.571224  |
| C              | -0.878569 | -4.580434 | -0.467240 | N               | -1.743626 | -0.834733 | 1.672469  |
| C              | -1.170548 | -3.352175 | 0.263874  |                 |           |           |           |

|   |           |           |           |                                    |           |           |           |
|---|-----------|-----------|-----------|------------------------------------|-----------|-----------|-----------|
| N | 0.401081  | 0.920590  | 2.470712  | <sup>4</sup> TS <sub>H</sub> (III) |           |           |           |
| N | 2.314003  | -0.874488 | 1.286884  | S                                  | 0.494128  | -1.760563 | 3.752146  |
| C | 1.248780  | -3.418448 | 0.090918  | O                                  | 0.065832  | -0.093964 | -0.169372 |
| C | 0.752084  | -4.644003 | -0.519282 | Fe                                 | 0.193348  | -0.922575 | 1.417558  |
| C | -0.620994 | -4.610647 | -0.418944 | N                                  | 0.031682  | -2.773105 | 0.585314  |
| C | -0.955945 | -3.370846 | 0.266772  | N                                  | -1.840474 | -0.907837 | 1.680553  |
| C | -2.634089 | -1.773383 | 1.189039  | N                                  | 0.364482  | 0.851963  | 2.402105  |
| C | -4.012720 | -1.394011 | 1.491268  | N                                  | 2.210663  | -1.009792 | 1.247438  |
| C | -3.951483 | -0.213866 | 2.212942  | C                                  | 1.068834  | -3.570873 | 0.128142  |
| C | -2.517262 | 0.111686  | 2.318472  | C                                  | 0.548328  | -4.792722 | -0.472158 |
| C | -0.638926 | 1.574759  | 3.096983  | C                                  | -0.825570 | -4.721973 | -0.393814 |
| C | -0.160858 | 2.759920  | 3.805312  | C                                  | -1.132735 | -3.477299 | 0.299599  |
| C | 1.200144  | 2.833083  | 3.586051  | C                                  | -2.762075 | -1.841023 | 1.242212  |
| C | 1.531967  | 1.672391  | 2.739211  | C                                  | -4.124489 | -1.419094 | 1.554587  |
| C | 3.189588  | 0.131185  | 1.660313  | C                                  | -4.022380 | -0.215127 | 2.233800  |
| C | 4.558195  | -0.226201 | 1.300192  | C                                  | -2.579228 | 0.079747  | 2.302479  |
| C | 4.505278  | -1.473991 | 0.713231  | C                                  | -0.658865 | 1.531049  | 3.028996  |
| C | 3.097768  | -1.862427 | 0.699267  | C                                  | -0.150436 | 2.702694  | 3.744832  |
| C | 2.588381  | -3.037103 | 0.159871  | C                                  | 1.212901  | 2.735381  | 3.535690  |
| H | 3.315949  | -3.722586 | -0.259953 | C                                  | 1.514069  | 1.569082  | 2.681140  |
| C | -2.249606 | -2.951111 | 0.552186  | C                                  | 3.110893  | -0.011157 | 1.569685  |
| H | -3.043995 | -3.631286 | 0.261604  | C                                  | 4.460690  | -0.385687 | 1.154839  |
| C | -1.971711 | 1.183378  | 3.022822  | C                                  | 4.372316  | -1.646781 | 0.604120  |
| H | -2.672493 | 1.797288  | 3.576187  | C                                  | 2.960930  | -2.025303 | 0.660904  |
| C | 2.806908  | 1.296974  | 2.320420  | C                                  | 2.419829  | -3.214127 | 0.185082  |
| H | 3.613074  | 1.975796  | 2.576477  | H                                  | 3.122775  | -3.945292 | -0.201073 |
| C | -1.299807 | -1.200976 | -2.802763 | C                                  | -2.413291 | -3.037904 | 0.616756  |
| H | -0.543244 | -0.664705 | -2.221859 | H                                  | -3.222167 | -3.717947 | 0.368290  |
| H | -2.068426 | -1.516853 | -2.086764 | C                                  | -1.998356 | 1.164020  | 2.965881  |
| H | -1.762228 | -0.492815 | -3.502271 | H                                  | -2.681740 | 1.803725  | 3.512302  |
| C | -0.699419 | -2.414231 | -3.528494 | C                                  | 2.773569  | 1.163200  | 2.243011  |
| H | -1.463081 | -2.995023 | -4.062948 | H                                  | 3.609083  | 1.811526  | 2.491222  |
| H | -0.207735 | -3.082156 | -2.815459 | C                                  | -1.287098 | -0.957348 | -2.164839 |
| H | 0.051972  | -2.113406 | -4.269225 | H                                  | -0.478032 | -0.587534 | -1.018847 |
| h | 0.718514  | -3.105391 | 3.708171  | H                                  | -2.232461 | -1.168146 | -1.660144 |
| h | 1.352055  | -5.384165 | -1.048679 | H                                  | -1.274670 | 0.012976  | -2.667291 |
| h | -1.355339 | -5.309449 | -0.819542 | C                                  | -0.672379 | -2.114080 | -2.911912 |
| h | -4.858911 | -1.984892 | 1.140716  | H                                  | -1.265204 | -2.368702 | -3.807342 |
| h | -4.727616 | 0.431189  | 2.624751  | H                                  | -0.625480 | -3.015845 | -2.297965 |
| h | -0.838110 | 3.426640  | 4.339054  | H                                  | 0.344646  | -1.893113 | -3.250807 |
| h | 1.943506  | 3.565268  | 3.901303  | h                                  | 0.662773  | -3.130026 | 3.730344  |
| h | 5.439995  | 0.395951  | 1.453239  | h                                  | 1.148001  | -5.532266 | -1.002756 |
| h | 5.323765  | -2.042114 | 0.271212  | h                                  | -1.571389 | -5.375134 | -0.846806 |
|   |           |           |           | h                                  | -4.991499 | -2.003046 | 1.245783  |

|                      |           |           |           |                     |           |           |           |
|----------------------|-----------|-----------|-----------|---------------------|-----------|-----------|-----------|
| h                    | -4.776343 | 0.458440  | 2.641126  | H                   | -0.617729 | -3.381405 | -2.787350 |
| h                    | -0.812037 | 3.385537  | 4.277821  | H                   | 0.262665  | -2.426429 | -3.994441 |
| h                    | 1.978117  | 3.437772  | 3.866078  | h                   | 0.672887  | -3.127714 | 3.722979  |
| h                    | 5.339689  | 0.253390  | 1.238546  | h                   | 1.212610  | -5.503302 | -0.994284 |
| h                    | 5.156012  | -2.225848 | 0.115685  | h                   | -1.511418 | -5.332575 | -0.866362 |
|                      |           |           |           | h                   | -4.952160 | -1.984414 | 1.200618  |
|                      |           |           |           | h                   | -4.774098 | 0.442005  | 2.660472  |
| <sup>4</sup> IC(III) |           |           |           | h                   | -0.825777 | 3.402573  | 4.326797  |
| S                    | 0.497132  | -1.759365 | 3.755791  | h                   | 1.953732  | 3.500941  | 3.852719  |
| O                    | -0.004480 | -0.063581 | -0.137107 | h                   | 5.340212  | 0.333922  | 1.252285  |
| Fe                   | 0.210432  | -0.901061 | 1.475420  | h                   | 5.195331  | -2.158050 | 0.147105  |
| N                    | 0.086811  | -2.732930 | 0.574891  |                     |           |           |           |
| N                    | -1.815100 | -0.888697 | 1.729575  |                     |           |           |           |
| N                    | 0.351296  | 0.876746  | 2.442596  | <sup>4</sup> IC(IV) |           |           |           |
| N                    | 2.230799  | -0.978303 | 1.265192  | S                   | 0.446686  | -1.770367 | 3.719866  |
| C                    | 1.127601  | -3.537886 | 0.129949  | O                   | 0.074621  | -0.076015 | -0.136470 |
| C                    | 0.609819  | -4.754416 | -0.480592 | Fe                  | 0.226136  | -0.899891 | 1.466165  |
| C                    | -0.765476 | -4.672958 | -0.423033 | N                   | 0.089852  | -2.713985 | 0.582841  |
| C                    | -1.074718 | -3.425306 | 0.265492  | N                   | -1.811908 | -0.883885 | 1.702765  |
| C                    | -2.721934 | -1.811628 | 1.237531  | N                   | 0.368866  | 0.845555  | 2.450320  |
| C                    | -4.093488 | -1.404977 | 1.539738  | N                   | 2.249765  | -0.978785 | 1.275011  |
| C                    | -4.010550 | -0.221559 | 2.254584  | C                   | 1.144935  | -3.523538 | 0.147797  |
| C                    | -2.570087 | 0.076869  | 2.360421  | C                   | 0.620683  | -4.735478 | -0.454285 |
| C                    | -0.666860 | 1.542844  | 3.088205  | C                   | -0.756416 | -4.651741 | -0.408044 |
| C                    | -0.162098 | 2.726494  | 3.787804  | C                   | -1.079537 | -3.410031 | 0.272812  |
| C                    | 1.194841  | 2.780551  | 3.547450  | C                   | -2.718872 | -1.812071 | 1.218412  |
| C                    | 1.497149  | 1.611531  | 2.693553  | C                   | -4.086538 | -1.401096 | 1.529178  |
| C                    | 3.112675  | 0.038217  | 1.581686  | C                   | -4.000911 | -0.218307 | 2.243466  |
| C                    | 4.469459  | -0.316791 | 1.172107  | C                   | -2.561804 | 0.087634  | 2.344180  |
| C                    | 4.404335  | -1.585397 | 0.631315  | C                   | -0.666416 | 1.521459  | 3.077376  |
| C                    | 3.000603  | -1.985028 | 0.687735  | C                   | -0.159056 | 2.699889  | 3.767953  |
| C                    | 2.475993  | -3.180028 | 0.204344  | C                   | 1.204963  | 2.746946  | 3.542863  |
| H                    | 3.189176  | -3.903843 | -0.177202 | C                   | 1.521257  | 1.578255  | 2.707687  |
| C                    | -2.359898 | -2.985618 | 0.579081  | C                   | 3.131193  | 0.038516  | 1.596505  |
| H                    | -3.165098 | -3.658195 | 0.298688  | C                   | 4.482463  | -0.320462 | 1.174876  |
| C                    | -2.002667 | 1.156762  | 3.042640  | C                   | 4.411110  | -1.586066 | 0.630912  |
| H                    | -2.690518 | 1.782535  | 3.599937  | C                   | 3.007763  | -1.987808 | 0.693180  |
| C                    | 2.756354  | 1.215086  | 2.246850  | C                   | 2.491151  | -3.185659 | 0.219281  |
| H                    | 3.583894  | 1.878008  | 2.483528  | H                   | 3.199338  | -3.915657 | -0.155913 |
| C                    | -1.171718 | -1.308434 | -2.824637 | C                   | -2.368832 | -2.987035 | 0.566363  |
| H                    | 0.107043  | -0.703688 | -0.876349 | H                   | -3.168966 | -3.665767 | 0.291511  |
| H                    | -1.893863 | -1.352350 | -2.015633 | C                   | -2.004423 | 1.162346  | 3.024820  |
| H                    | -0.942019 | -0.324916 | -3.225034 | H                   | -2.689497 | 1.795399  | 3.574410  |
| C                    | -0.708820 | -2.556370 | -3.501268 | C                   | 2.788639  | 1.201510  | 2.274856  |
| H                    | -1.414078 | -2.896395 | -4.284004 | H                   | 3.612670  | 1.861532  | 2.524958  |

|                         |           |           |           |                |           |           |           |
|-------------------------|-----------|-----------|-----------|----------------|-----------|-----------|-----------|
| C                       | -1.233579 | -1.291367 | -2.761114 | C              | -2.410839 | -2.865607 | 0.573573  |
| H                       | -0.105224 | -0.691718 | -0.886038 | H              | -3.228334 | -3.522343 | 0.291374  |
| H                       | -1.985344 | -1.389311 | -1.982542 | C              | -1.992825 | 1.225974  | 3.115315  |
| H                       | -1.060963 | -0.296875 | -3.164325 | H              | -2.666490 | 1.862976  | 3.677198  |
| C                       | -0.706756 | -2.508726 | -3.446007 | C              | 2.779543  | 1.207133  | 2.318830  |
| H                       | -1.376299 | -2.846324 | -4.260138 | H              | 3.616853  | 1.850410  | 2.574650  |
| H                       | -0.616520 | -3.347043 | -2.749109 | C              | -0.797413 | 0.643101  | -2.248304 |
| H                       | 0.275721  | -2.340056 | -3.902881 | H              | -0.331968 | 0.975784  | 0.122752  |
| h                       | 0.641638  | -3.136039 | 3.684084  | H              | -1.400414 | 1.488945  | -1.925618 |
| h                       | 1.220171  | -5.487196 | -0.967705 | H              | 0.188036  | 0.863935  | -2.641995 |
| h                       | -1.498157 | -5.312962 | -0.856011 | C              | -1.457919 | -0.662762 | -2.530030 |
| h                       | -4.947293 | -1.980105 | 1.194640  | H              | -2.065477 | -0.630621 | -3.452935 |
| h                       | -4.764117 | 0.441516  | 2.656038  | H              | -2.125088 | -0.945924 | -1.707983 |
| h                       | -0.818961 | 3.387454  | 4.296959  | H              | -0.726274 | -1.469878 | -2.637247 |
| h                       | 1.957026  | 3.474574  | 3.847861  | h              | 0.684807  | -3.145421 | 3.759527  |
| h                       | 5.351378  | 0.333661  | 1.246826  | h              | 1.109416  | -5.409203 | -1.056998 |
| h                       | 5.197636  | -2.161235 | 0.142420  | h              | -1.603898 | -5.199116 | -0.928059 |
|                         |           |           |           | h              | -4.987042 | -1.854212 | 1.237886  |
|                         |           |           |           | h              | -4.778747 | 0.542330  | 2.751951  |
| <sup>4</sup> TSreb(III) |           |           |           | h              | -0.784408 | 3.454837  | 4.379120  |
| S                       | 0.497819  | -1.780178 | 3.833647  | h              | 2.005232  | 3.495756  | 3.936192  |
| O                       | -0.035181 | 0.076469  | -0.140103 | h              | 5.358461  | 0.275496  | 1.336534  |
| Fe                      | 0.197078  | -0.852185 | 1.498124  | h              | 5.163478  | -2.194655 | 0.201725  |
| N                       | 0.037718  | -2.652467 | 0.574780  |                |           |           |           |
| N                       | -1.840615 | -0.797827 | 1.765499  | <sup>4</sup> P |           |           |           |
| N                       | 0.361928  | 0.913969  | 2.500982  | S              | 0.453997  | -1.828077 | 3.939519  |
| N                       | 2.215574  | -0.960893 | 1.304774  | O              | -0.191264 | 0.558719  | -0.380652 |
| C                       | 1.059339  | -3.463999 | 0.110846  | Fe             | 0.185117  | -0.962400 | 1.611687  |
| C                       | 0.518116  | -4.654794 | -0.538059 | N              | 0.011906  | -2.681805 | 0.590255  |
| C                       | -0.851240 | -4.548968 | -0.482100 | N              | -1.859788 | -0.833701 | 1.724322  |
| C                       | -1.139711 | -3.312361 | 0.240704  | N              | 0.336495  | 0.886750  | 2.451863  |
| C                       | -2.756579 | -1.697526 | 1.262343  | N              | 2.182604  | -0.966596 | 1.254661  |
| C                       | -4.122199 | -1.286033 | 1.580355  | C              | 1.049169  | -3.487254 | 0.114062  |
| C                       | -4.024585 | -0.117151 | 2.322543  | C              | 0.507747  | -4.673319 | -0.526616 |
| C                       | -2.582101 | 0.164077  | 2.426603  | C              | -0.865810 | -4.580420 | -0.458638 |
| C                       | -0.648599 | 1.590971  | 3.156212  | C              | -1.166626 | -3.358850 | 0.268925  |
| C                       | -0.126311 | 2.763861  | 3.852312  | C              | -2.781760 | -1.754929 | 1.252909  |
| C                       | 1.235448  | 2.792377  | 3.618769  | C              | -4.141977 | -1.330669 | 1.564328  |
| C                       | 1.520383  | 1.625590  | 2.761158  | C              | -4.042610 | -0.142734 | 2.275612  |
| C                       | 3.119919  | 0.033450  | 1.646312  | C              | -2.600677 | 0.148592  | 2.368219  |
| C                       | 4.472685  | -0.353475 | 1.247862  | C              | -0.687571 | 1.573357  | 3.095655  |
| C                       | 4.382848  | -1.614384 | 0.693629  | C              | -0.160942 | 2.727522  | 3.809551  |
| C                       | 2.966841  | -1.977026 | 0.725068  | C              | 1.209149  | 2.737691  | 3.610703  |
| C                       | 2.415112  | -3.145781 | 0.208388  | C              | 1.505044  | 1.583019  | 2.749988  |
| H                       | 3.110595  | -3.879572 | -0.185833 |                |           |           |           |

|   |           |           |           |                                   |           |           |           |
|---|-----------|-----------|-----------|-----------------------------------|-----------|-----------|-----------|
| C | 3.089176  | 0.022111  | 1.616296  | C                                 | -3.889681 | -1.463463 | 1.461508  |
| C | 4.439859  | -0.365919 | 1.219418  | C                                 | -3.867644 | -0.291332 | 2.199894  |
| C | 4.349936  | -1.623335 | 0.656776  | C                                 | -2.441791 | 0.064285  | 2.330944  |
| C | 2.936171  | -1.988459 | 0.683079  | C                                 | -0.609293 | 1.574381  | 3.130396  |
| C | 2.400968  | -3.171434 | 0.192176  | C                                 | -0.168172 | 2.779548  | 3.830767  |
| H | 3.097587  | -3.907958 | -0.191647 | C                                 | 1.202364  | 2.846813  | 3.680232  |
| C | -2.445838 | -2.932336 | 0.592362  | C                                 | 1.575394  | 1.672385  | 2.872951  |
| H | -3.255912 | -3.602111 | 0.325297  | C                                 | 3.279592  | 0.156041  | 1.835370  |
| C | -2.030069 | 1.226988  | 3.038563  | C                                 | 4.660203  | -0.165798 | 1.487934  |
| H | -2.707456 | 1.870047  | 3.586909  | C                                 | 4.640135  | -1.416101 | 0.908168  |
| C | 2.766940  | 1.178317  | 2.317969  | C                                 | 3.241644  | -1.834786 | 0.872406  |
| H | 3.606801  | 1.806598  | 2.596997  | C                                 | 2.765420  | -2.998966 | 0.281102  |
| C | -0.814930 | 0.708726  | -1.701514 | H                                 | 3.520966  | -3.659147 | -0.129579 |
| H | -0.384087 | 1.316441  | 0.207906  | C                                 | -2.077736 | -2.978335 | 0.538216  |
| H | -1.650289 | 1.417034  | -1.634578 | H                                 | -2.859360 | -3.654341 | 0.207400  |
| H | -0.067415 | 1.112866  | -2.397128 | C                                 | -1.934282 | 1.165655  | 3.018531  |
| C | -1.301221 | -0.650654 | -2.177869 | H                                 | -2.658866 | 1.794004  | 3.522099  |
| H | -1.714271 | -0.571076 | -3.191035 | C                                 | 2.864969  | 1.312489  | 2.492551  |
| H | -2.071929 | -1.042410 | -1.508419 | H                                 | 3.656742  | 1.999024  | 2.771051  |
| H | -0.478024 | -1.371690 | -2.187552 | C                                 | -1.662348 | 0.831080  | -3.563200 |
| h | 0.661687  | -3.187423 | 3.823812  | H                                 | -2.001450 | 1.714597  | -3.007752 |
| h | 1.097927  | -5.422257 | -1.054674 | H                                 | -2.446179 | 0.572038  | -4.288710 |
| h | -1.612195 | -5.234657 | -0.909138 | H                                 | -0.767106 | 1.119558  | -4.129586 |
| h | -5.009114 | -1.905675 | 1.239505  | C                                 | -1.355347 | -0.332906 | -2.606822 |
| h | -4.797695 | 0.514648  | 2.706613  | H                                 | -2.274140 | -0.621768 | -2.071753 |
| h | -0.815240 | 3.422651  | 4.335628  | H                                 | -0.659247 | 0.002593  | -1.831362 |
| h | 1.980348  | 3.424466  | 3.959499  | C                                 | -0.759199 | -1.572812 | -3.293703 |
| h | 5.327580  | 0.258685  | 1.318862  | H                                 | 0.146035  | -1.304509 | -3.853299 |
| h | 5.133576  | -2.202020 | 0.167798  | H                                 | -1.465693 | -2.034134 | -3.998426 |
|   |           |           |           | H                                 | -0.480199 | -2.333420 | -2.556176 |
|   |           |           |           | h                                 | 0.647550  | -3.072972 | 3.861575  |
|   |           |           |           | h                                 | 1.603851  | -5.302814 | -1.088173 |
|   |           |           |           | h                                 | -1.123792 | -5.296479 | -0.873994 |
|   |           |           |           | h                                 | -4.723284 | -2.053830 | 1.081193  |
|   |           |           |           | h                                 | -4.666536 | 0.322469  | 2.615932  |
|   |           |           |           | h                                 | -0.876457 | 3.465321  | 4.295648  |
|   |           |           |           | h                                 | 1.932747  | 3.582022  | 4.017983  |
|   |           |           |           | h                                 | 5.524956  | 0.482006  | 1.631521  |
|   |           |           |           | h                                 | 5.481609  | -1.983708 | 0.510916  |
|   |           |           |           |                                   |           |           |           |
|   |           |           |           | <sup>2</sup> TS <sub>H(III)</sub> |           |           |           |
|   |           |           |           | S                                 | 0.473347  | -1.691977 | 3.847869  |
|   |           |           |           | O                                 | 0.327859  | 0.059766  | -0.036675 |
|   |           |           |           | Fe                                | 0.341265  | -0.862911 | 1.485885  |

Propane reaction:

<sup>2</sup>RC

|    |           |           |           |
|----|-----------|-----------|-----------|
| S  | 0.477868  | -1.704587 | 3.917059  |
| O  | 0.324488  | -0.044862 | 0.050856  |
| Fe | 0.395370  | -0.816729 | 1.509553  |
| N  | 0.360050  | -2.666332 | 0.635111  |
| N  | -1.637263 | -0.868935 | 1.705748  |
| N  | 0.459487  | 0.910998  | 2.567417  |
| N  | 2.430624  | -0.868241 | 1.457173  |
| C  | 1.434466  | -3.390663 | 0.135327  |
| C  | 0.970407  | -4.585828 | -0.565922 |
| C  | -0.405230 | -4.583113 | -0.470455 |
| C  | -0.772137 | -3.380979 | 0.269103  |
| C  | -2.496399 | -1.819096 | 1.189612  |

|   |           |           |           |                                              |           |           |           |
|---|-----------|-----------|-----------|----------------------------------------------|-----------|-----------|-----------|
| N | 0.296613  | -2.679521 | 0.561339  | h                                            | -0.937739 | 3.450826  | 4.233707  |
| N | -1.689279 | -0.915531 | 1.647940  | h                                            | 1.876695  | 3.558379  | 3.996123  |
| N | 0.415717  | 0.901673  | 2.506799  | h                                            | 5.479940  | 0.464035  | 1.600755  |
| N | 2.382000  | -0.876166 | 1.406682  | h                                            | 5.436189  | -1.994620 | 0.469162  |
| C | 1.380190  | -3.397639 | 0.068751  |                                              |           |           |           |
| C | 0.927463  | -4.609719 | -0.611961 | <sup>2</sup> T <sub>S<sub>H</sub></sub> (IV) |           |           |           |
| C | -0.447467 | -4.631002 | -0.502131 | S                                            | 0.458300  | -1.696660 | 3.807024  |
| C | -0.828394 | -3.428415 | 0.228652  | O                                            | 0.321365  | 0.047004  | 0.027687  |
| C | -2.553651 | -1.884451 | 1.170813  | Fe                                           | 0.349122  | -0.876936 | 1.495585  |
| C | -3.941485 | -1.533200 | 1.465424  | N                                            | 0.309085  | -2.679687 | 0.582549  |
| C | -3.913632 | -0.344748 | 2.179828  | N                                            | -1.683865 | -0.913363 | 1.661439  |
| C | -2.487275 | 0.025346  | 2.274848  | N                                            | 0.414310  | 0.877380  | 2.529835  |
| C | -0.659445 | 1.564199  | 3.055077  | N                                            | 2.386240  | -0.891568 | 1.403618  |
| C | -0.226115 | 2.768957  | 3.768184  | C                                            | 1.398735  | -3.405475 | 0.090860  |
| C | 1.146127  | 2.831606  | 3.640963  | C                                            | 0.933160  | -4.606307 | -0.592464 |
| C | 1.527602  | 1.656175  | 2.834120  | C                                            | -0.443401 | -4.616211 | -0.488836 |
| C | 3.232418  | 0.140179  | 1.800154  | C                                            | -0.825395 | -3.417153 | 0.241682  |
| C | 4.614674  | -0.182012 | 1.452414  | C                                            | -2.542844 | -1.882342 | 1.172152  |
| C | 4.592690  | -1.426010 | 0.860645  | C                                            | -3.929949 | -1.525805 | 1.459803  |
| C | 3.190335  | -1.839020 | 0.814406  | C                                            | -3.905951 | -0.342551 | 2.182960  |
| C | 2.710756  | -2.997581 | 0.214585  | C                                            | -2.482948 | 0.030279  | 2.292048  |
| H | 3.467912  | -3.657497 | -0.194357 | C                                            | -0.666630 | 1.548381  | 3.068765  |
| C | -2.134881 | -3.050040 | 0.527168  | C                                            | -0.223603 | 2.751616  | 3.769884  |
| H | -2.911466 | -3.748022 | 0.230840  | C                                            | 1.151267  | 2.804317  | 3.648304  |
| C | -1.980095 | 1.143664  | 2.939895  | C                                            | 1.534301  | 1.625532  | 2.852412  |
| H | -2.707989 | 1.772308  | 3.439162  | C                                            | 3.230594  | 0.131020  | 1.807111  |
| C | 2.820750  | 1.289994  | 2.470559  | C                                            | 4.610651  | -0.189822 | 1.453815  |
| H | 3.615051  | 1.967169  | 2.765607  | C                                            | 4.592154  | -1.434231 | 0.862275  |
| C | -1.271985 | 0.781347  | -2.628271 | C                                            | 3.194148  | -1.854653 | 0.814806  |
| H | -1.841259 | 1.374862  | -1.904374 | C                                            | 2.727713  | -3.022333 | 0.228030  |
| H | -1.864845 | 0.719117  | -3.557429 | H                                            | 3.483529  | -3.685728 | -0.174464 |
| H | -0.351033 | 1.326280  | -2.867641 | C                                            | -2.133115 | -3.044619 | 0.525893  |
| C | -0.955797 | -0.599960 | -2.094814 | H                                            | -2.908432 | -3.737820 | 0.219792  |
| H | -1.821211 | -1.141747 | -1.697979 | C                                            | -1.988479 | 1.146621  | 2.956383  |
| H | -0.284170 | -0.332823 | -0.929249 | H                                            | -2.714201 | 1.780789  | 3.449687  |
| C | 0.003438  | -1.445192 | -2.902779 | C                                            | 2.829174  | 1.269205  | 2.491546  |
| H | 0.966659  | -0.933976 | -3.018095 | H                                            | 3.623091  | 1.941410  | 2.795354  |
| H | -0.390095 | -1.626407 | -3.917462 | C                                            | -1.282237 | 0.796965  | -2.626649 |
| H | 0.184877  | -2.418761 | -2.438651 | H                                            | -1.850654 | 1.396465  | -1.907330 |
| h | 0.637274  | -3.061276 | 3.797925  | H                                            | -1.887397 | 0.700738  | -3.543168 |
| h | 1.565496  | -5.324891 | -1.131103 | H                                            | -0.372286 | 1.347519  | -2.892463 |
| h | -1.154909 | -5.363090 | -0.891542 | C                                            | -0.943804 | -0.574406 | -2.067985 |
| h | -4.779020 | -2.136990 | 1.116083  | H                                            | -1.818620 | -1.124587 | -1.700296 |
| h | -4.709406 | 0.264319  | 2.608603  | H                                            | -0.341483 | -0.339805 | -0.996275 |

|                      |           |           |           |                     |           |           |           |
|----------------------|-----------|-----------|-----------|---------------------|-----------|-----------|-----------|
| C                    | 0.001674  | -1.425455 | -2.895993 | C                   | 2.845931  | 1.312732  | 2.488783  |
| H                    | 0.949595  | -0.902445 | -3.066150 | H                   | 3.639468  | 1.994079  | 2.776463  |
| H                    | -0.438916 | -1.637831 | -3.883190 | C                   | -1.330271 | 0.761195  | -2.956040 |
| H                    | 0.217372  | -2.382808 | -2.413454 | H                   | -1.801012 | 1.394282  | -2.194717 |
| h                    | 0.630119  | -3.065277 | 3.765652  | H                   | -1.893307 | 0.913674  | -3.896894 |
| h                    | 1.565467  | -5.325543 | -1.112996 | H                   | -0.315168 | 1.138832  | -3.131744 |
| h                    | -1.152383 | -5.344281 | -0.882948 | C                   | -1.307758 | -0.677705 | -2.540216 |
| h                    | -4.766599 | -2.124951 | 1.100488  | H                   | -2.158310 | -1.066199 | -1.978998 |
| h                    | -4.704697 | 0.260681  | 2.614450  | H                   | -0.246330 | -0.407544 | -0.728487 |
| h                    | -0.931807 | 3.445073  | 4.223351  | C                   | -0.335385 | -1.657590 | -3.119549 |
| h                    | 1.881172  | 3.534146  | 3.998526  | H                   | 0.644167  | -1.189921 | -3.276972 |
| h                    | 5.473901  | 0.460309  | 1.595926  | H                   | -0.666277 | -2.044725 | -4.102304 |
| h                    | 5.437072  | -2.001383 | 0.471740  | H                   | -0.196931 | -2.530947 | -2.473210 |
|                      |           |           |           | h                   | 0.637282  | -3.066227 | 3.834705  |
|                      |           |           |           | h                   | 1.596964  | -5.302076 | -1.111999 |
|                      |           |           |           | h                   | -1.129236 | -5.344760 | -0.867232 |
|                      |           |           |           | h                   | -4.753099 | -2.102891 | 1.110739  |
|                      |           |           |           | h                   | -4.684464 | 0.295943  | 2.610142  |
|                      |           |           |           | h                   | -0.913195 | 3.466838  | 4.261118  |
|                      |           |           |           | h                   | 1.901850  | 3.578854  | 4.022476  |
|                      |           |           |           | h                   | 5.505307  | 0.487491  | 1.613306  |
|                      |           |           |           | h                   | 5.462245  | -1.978250 | 0.495342  |
| <sup>2</sup> IC(III) |           |           |           | <sup>2</sup> IC(IV) |           |           |           |
| S                    | 0.481651  | -1.695894 | 3.882800  | S                   | 0.457869  | -1.697532 | 3.812229  |
| O                    | 0.328389  | 0.035274  | -0.060003 | O                   | 0.294805  | 0.027117  | -0.024902 |
| Fe                   | 0.376704  | -0.846937 | 1.529957  | Fe                  | 0.371693  | -0.838891 | 1.529031  |
| N                    | 0.326836  | -2.670996 | 0.598518  | N                   | 0.325537  | -2.647592 | 0.599729  |
| N                    | -1.661939 | -0.897776 | 1.678046  | N                   | -1.670199 | -0.872838 | 1.680388  |
| N                    | 0.444767  | 0.916487  | 2.539020  | N                   | 0.431924  | 0.900641  | 2.556448  |
| N                    | 2.409627  | -0.858679 | 1.439470  | N                   | 2.402481  | -0.863689 | 1.429813  |
| C                    | 1.407351  | -3.385078 | 0.100054  | C                   | 1.413588  | -3.375063 | 0.108047  |
| C                    | 0.955988  | -4.594019 | -0.586764 | C                   | 0.944914  | -4.570529 | -0.582086 |
| C                    | -0.419509 | -4.616218 | -0.475340 | C                   | -0.432624 | -4.575207 | -0.481460 |
| C                    | -0.798510 | -3.415176 | 0.259753  | C                   | -0.811474 | -3.376609 | 0.252178  |
| C                    | -2.526607 | -1.861483 | 1.189452  | C                   | -2.527691 | -1.837875 | 1.180174  |
| C                    | -3.916166 | -1.503869 | 1.469600  | C                   | -3.915932 | -1.477702 | 1.460338  |
| C                    | -3.888565 | -0.316105 | 2.185867  | C                   | -3.892649 | -0.298995 | 2.191500  |
| C                    | -2.461330 | 0.045458  | 2.294926  | C                   | -2.470054 | 0.069498  | 2.310491  |
| C                    | -0.631290 | 1.578995  | 3.086595  | C                   | -0.649900 | 1.573170  | 3.096141  |
| C                    | -0.199357 | 2.784792  | 3.799258  | C                   | -0.205179 | 2.774872  | 3.795524  |
| C                    | 1.172587  | 2.849080  | 3.670806  | C                   | 1.170089  | 2.828523  | 3.669591  |
| C                    | 1.553737  | 1.674536  | 2.862592  | C                   | 1.552089  | 1.652177  | 2.871991  |
| C                    | 3.259489  | 0.159535  | 1.822343  | C                   | 3.246390  | 0.162186  | 1.821647  |
| C                    | 4.641103  | -0.161387 | 1.471264  |                     |           |           |           |
| C                    | 4.619745  | -1.409519 | 0.888794  |                     |           |           |           |
| C                    | 3.217517  | -1.824014 | 0.848051  |                     |           |           |           |
| C                    | 2.738700  | -2.982835 | 0.248946  |                     |           |           |           |
| H                    | 3.497055  | -3.642148 | -0.159315 |                     |           |           |           |
| C                    | -2.105600 | -3.030221 | 0.552667  |                     |           |           |           |
| H                    | -2.883626 | -3.724430 | 0.250656  |                     |           |           |           |
| C                    | -1.952235 | 1.161599  | 2.964551  |                     |           |           |           |
| H                    | -2.681220 | 1.793189  | 3.458636  |                     |           |           |           |



|                |           |           |           |                 |           |           |           |
|----------------|-----------|-----------|-----------|-----------------|-----------|-----------|-----------|
| C              | 4.625463  | -0.160545 | 1.466839  | C               | -2.523006 | -1.949589 | 1.134276  |
| C              | 4.606347  | -1.409765 | 0.885058  | C               | -3.909614 | -1.601725 | 1.437572  |
| C              | 3.208187  | -1.830908 | 0.842995  | C               | -3.885549 | -0.410924 | 2.149214  |
| C              | 2.743345  | -2.999185 | 0.256212  | C               | -2.462371 | -0.025992 | 2.233586  |
| H              | 3.499337  | -3.664892 | -0.142079 | C               | -0.645912 | 1.518797  | 2.980203  |
| C              | -2.119159 | -2.998993 | 0.531896  | C               | -0.208056 | 2.718666  | 3.696314  |
| H              | -2.896457 | -3.686619 | 0.218801  | C               | 1.163887  | 2.788706  | 3.560084  |
| C              | -1.973970 | 1.180119  | 2.981782  | C               | 1.547243  | 1.625594  | 2.739486  |
| H              | -2.698005 | 1.816088  | 3.474817  | C               | 3.246981  | 0.141288  | 1.680308  |
| C              | 2.846767  | 1.302390  | 2.503477  | C               | 4.625946  | -0.201507 | 1.361185  |
| H              | 3.639921  | 1.978615  | 2.800288  | C               | 4.603252  | -1.453957 | 0.781801  |
| C              | -1.294347 | 0.773791  | -2.870491 | C               | 3.203916  | -1.862749 | 0.710883  |
| H              | -1.841488 | 1.362955  | -2.125039 | C               | 2.740981  | -3.050515 | 0.155091  |
| H              | -1.837767 | 0.877820  | -3.828698 | H               | 3.502798  | -3.718434 | -0.230227 |
| H              | -0.308886 | 1.233300  | -3.015144 | C               | -2.109830 | -3.121236 | 0.501686  |
| C              | -1.168611 | -0.663018 | -2.463265 | H               | -2.884405 | -3.822961 | 0.211690  |
| H              | -2.025269 | -1.137004 | -1.982404 | C               | -1.964990 | 1.099702  | 2.886501  |
| H              | -0.269244 | -0.361276 | -0.750656 | H               | -2.689212 | 1.722795  | 3.397038  |
| C              | -0.108264 | -1.545097 | -3.046682 | C               | 2.843542  | 1.280114  | 2.366516  |
| H              | 0.871594  | -1.050459 | -3.031243 | H               | 3.637834  | 1.949401  | 2.677595  |
| H              | -0.317560 | -1.788040 | -4.105538 | C               | -1.184164 | 0.939725  | -2.075577 |
| H              | -0.023168 | -2.495918 | -2.511548 | H               | -1.616832 | 1.523557  | -1.258058 |
| h              | 0.631202  | -3.065841 | 3.767159  | H               | -1.969169 | 0.729453  | -2.812586 |
| h              | 1.577304  | -5.288123 | -1.104780 | H               | -0.413698 | 1.541164  | -2.574059 |
| h              | -1.144242 | -5.301444 | -0.874202 | C               | -0.593925 | -0.366753 | -1.551525 |
| h              | -4.752548 | -2.072646 | 1.094030  | H               | -1.373053 | -0.980541 | -1.097713 |
| h              | -4.691617 | 0.304555  | 2.622130  | H               | 1.236987  | 0.062531  | -0.675736 |
| h              | -0.912927 | 3.470112  | 4.246966  | C               | 0.164670  | -1.157453 | -2.615585 |
| h              | 1.898980  | 3.559605  | 4.019312  | H               | 0.986936  | -0.560226 | -3.032764 |
| h              | 5.487667  | 0.492549  | 1.601525  | H               | -0.509138 | -1.412388 | -3.441883 |
| h              | 5.449741  | -1.977765 | 0.492465  | H               | 0.576252  | -2.084301 | -2.208468 |
|                |           |           |           | h               | 0.627158  | -3.056454 | 3.733278  |
|                |           |           |           | h               | 1.588116  | -5.364854 | -1.201193 |
| <sup>2</sup> P |           |           |           | h               | -1.127662 | -5.420236 | -0.929093 |
| S              | 0.483658  | -1.684177 | 3.757989  | h               | -4.748068 | -2.208602 | 1.095867  |
| O              | 0.305309  | -0.062170 | -0.404002 | h               | -4.681517 | 0.186310  | 2.593978  |
| Fe             | 0.371399  | -0.950338 | 1.505640  | h               | -0.916183 | 3.395330  | 4.174591  |
| N              | 0.326405  | -2.748448 | 0.536033  | h               | 1.892290  | 3.516940  | 3.916697  |
| N              | -1.663193 | -0.961683 | 1.593499  | h               | 5.495797  | 0.434057  | 1.526967  |
| N              | 0.433208  | 0.869247  | 2.408159  | h               | 5.452757  | -2.030476 | 0.415695  |
| N              | 2.387198  | -0.866704 | 1.251212  |                 |           |           |           |
| C              | 1.413898  | -3.459040 | 0.032784  |                 |           |           |           |
| C              | 0.954495  | -4.667172 | -0.653625 | <sup>4</sup> RC |           |           |           |
| C              | -0.419500 | -4.691080 | -0.535515 | S               | 0.482903  | -1.699089 | 3.904420  |
| C              | -0.801685 | -3.494348 | 0.205718  | O               | 0.323348  | -0.048126 | 0.057358  |

|    |           |           |           |                                    |           |           |           |           |
|----|-----------|-----------|-----------|------------------------------------|-----------|-----------|-----------|-----------|
| Fe | 0.397330  | -0.820466 | 1.517572  | h                                  | -4.667706 | 0.323392  | 2.614923  |           |
| N  | 0.359159  | -2.666881 | 0.636864  | h                                  | -0.877222 | 3.465272  | 4.297121  |           |
| N  | -1.638000 | -0.868580 | 1.706118  | h                                  | 1.932387  | 3.582175  | 4.019438  |           |
| N  | 0.459608  | 0.910665  | 2.569766  | h                                  | 5.524382  | 0.482089  | 1.630754  |           |
| N  | 2.429696  | -0.869115 | 1.458996  | h                                  | 5.481275  | -1.984448 | 0.512776  |           |
| C  | 1.433645  | -3.391506 | 0.136665  |                                    |           |           |           |           |
| C  | 0.969195  | -4.585978 | -0.566346 |                                    |           |           |           |           |
| C  | -0.406495 | -4.583545 | -0.470772 | <sup>4</sup> TS <sub>H</sub> (III) | S         | 0.478129  | -1.688454 | 3.844975  |
| C  | -0.773297 | -3.381188 | 0.269512  |                                    | O         | 0.253595  | 0.034327  | -0.074039 |
| C  | -2.497025 | -1.818644 | 1.189250  |                                    | Fe        | 0.351182  | -0.832924 | 1.479659  |
| C  | -3.890439 | -1.462737 | 1.461068  |                                    | N         | 0.304283  | -2.671558 | 0.565112  |
| C  | -3.868611 | -0.290491 | 2.199397  |                                    | N         | -1.688738 | -0.903476 | 1.665646  |
| C  | -2.442587 | 0.064960  | 2.331114  |                                    | N         | 0.417011  | 0.920155  | 2.496269  |
| C  | -0.609771 | 1.574081  | 3.132246  |                                    | N         | 2.380609  | -0.850790 | 1.386696  |
| C  | -0.168747 | 2.779702  | 3.832230  |                                    | C         | 1.382924  | -3.387311 | 0.066958  |
| C  | 1.201948  | 2.847064  | 3.681596  |                                    | C         | 0.929559  | -4.598923 | -0.614064 |
| C  | 1.575348  | 1.672105  | 2.875374  |                                    | C         | -0.445586 | -4.618866 | -0.499983 |
| C  | 3.279184  | 0.155423  | 1.837216  |                                    | C         | -0.821379 | -3.415945 | 0.234348  |
| C  | 4.659836  | -0.166374 | 1.488894  |                                    | C         | -2.549670 | -1.872887 | 1.184489  |
| C  | 4.639602  | -1.416991 | 0.909820  |                                    | C         | -3.939627 | -1.522276 | 1.473458  |
| C  | 3.241095  | -1.835891 | 0.874300  |                                    | C         | -3.914421 | -0.332170 | 2.185561  |
| C  | 2.764890  | -2.999978 | 0.282513  |                                    | C         | -2.488107 | 0.037017  | 2.283771  |
| H  | 3.520561  | -3.659707 | -0.128085 |                                    | C         | -0.657992 | 1.577422  | 3.057416  |
| C  | -2.078529 | -2.978255 | 0.538408  |                                    | C         | -0.222046 | 2.777961  | 3.775506  |
| H  | -2.859956 | -3.653945 | 0.206785  |                                    | C         | 1.149257  | 2.843880  | 3.641578  |
| C  | -1.934845 | 1.165605  | 3.019821  |                                    | C         | 1.528100  | 1.675586  | 2.824006  |
| H  | -2.659543 | 1.794024  | 3.522946  |                                    | C         | 3.232933  | 0.162632  | 1.780907  |
| C  | 2.864950  | 1.311837  | 2.494511  |                                    | C         | 4.615909  | -0.165051 | 1.443288  |
| H  | 3.656900  | 1.998673  | 2.771409  |                                    | C         | 4.593821  | -1.412137 | 0.857724  |
| C  | -1.662273 | 0.838007  | -3.562202 |                                    | C         | 3.190967  | -1.821982 | 0.805639  |
| H  | -2.002096 | 1.722240  | -3.008329 |                                    | C         | 2.714226  | -2.984332 | 0.212151  |
| H  | -2.446137 | 0.576833  | -4.286813 |                                    | H         | 3.472742  | -3.645587 | -0.192259 |
| H  | -0.767254 | 1.125725  | -4.129322 |                                    | C         | -2.127680 | -3.036684 | 0.539532  |
| C  | -1.354316 | -0.324375 | -2.604684 |                                    | H         | -2.904495 | -3.734039 | 0.241955  |
| H  | -2.272524 | -0.614722 | -2.069438 |                                    | C         | -1.978415 | 1.157979  | 2.946429  |
| H  | -0.658256 | 0.012524  | -1.830558 |                                    | H         | -2.705429 | 1.786997  | 3.446508  |
| C  | -0.757417 | -1.564818 | -3.290082 |                                    | C         | 2.820060  | 1.314296  | 2.449438  |
| H  | 0.147221  | -1.296488 | -3.850579 |                                    | H         | 3.613966  | 1.993618  | 2.740536  |
| H  | -1.464455 | -2.027622 | -3.993150 |                                    | C         | -1.279083 | 0.758530  | -2.690847 |
| H  | -0.477280 | -2.324203 | -2.551689 |                                    | H         | -1.849055 | 1.365405  | -1.977990 |
| h  | 0.650231  | -3.067979 | 3.854526  |                                    | H         | -1.847227 | 0.725120  | -3.636854 |
| h  | 1.603186  | -5.302444 | -1.088648 |                                    | H         | -0.334519 | 1.276345  | -2.896971 |
| h  | -1.124277 | -5.297727 | -0.874256 |                                    | C         | -1.021686 | -0.635381 | -2.155755 |
| h  | -4.723952 | -2.053155 | 1.080633  |                                    | H         | -1.917110 | -1.152211 | -1.793104 |

|                      |           |           |           |                     |           |           |           |
|----------------------|-----------|-----------|-----------|---------------------|-----------|-----------|-----------|
| H                    | -0.357649 | -0.374619 | -0.958675 | C                   | 2.845400  | 1.312783  | 2.490937  |
| C                    | -0.065303 | -1.509068 | -2.938425 | H                   | 3.637977  | 1.997610  | 2.773470  |
| H                    | 0.909251  | -1.017293 | -3.043390 | C                   | -1.328097 | 0.752802  | -2.953772 |
| H                    | -0.442872 | -1.703481 | -3.956875 | H                   | -1.804861 | 1.383789  | -2.194313 |
| H                    | 0.091891  | -2.478062 | -2.455014 | H                   | -1.880010 | 0.907900  | -3.900538 |
| h                    | 0.637416  | -3.058335 | 3.795996  | H                   | -0.311410 | 1.132753  | -3.115681 |
| h                    | 1.567638  | -5.313591 | -1.133844 | C                   | -1.305913 | -0.687523 | -2.542962 |
| h                    | -1.155008 | -5.349134 | -0.889207 | H                   | -2.164769 | -1.081216 | -1.998095 |
| h                    | -4.775888 | -2.126510 | 1.121840  | H                   | -0.250238 | -0.410956 | -0.715749 |
| h                    | -4.710863 | 0.279121  | 2.609908  | C                   | -0.328165 | -1.662550 | -3.121070 |
| h                    | -0.931778 | 3.457184  | 4.247739  | H                   | 0.654313  | -1.194121 | -3.258100 |
| h                    | 1.880395  | 3.569120  | 3.998695  | H                   | -0.642934 | -2.040254 | -4.112481 |
| h                    | 5.482429  | 0.478442  | 1.595362  | H                   | -0.198531 | -2.541881 | -2.480911 |
| h                    | 5.437758  | -1.983078 | 0.470601  | h                   | 0.643998  | -3.065881 | 3.826033  |
| <sup>4</sup> IC(III) |           |           |           | h                   | 1.595887  | -5.301388 | -1.114245 |
| S                    | 0.491044  | -1.695259 | 3.874496  | h                   | -1.127272 | -5.342742 | -0.868306 |
| O                    | 0.318287  | 0.037821  | -0.045117 | h                   | -4.751913 | -2.102661 | 1.109525  |
| Fe                   | 0.377260  | -0.846093 | 1.540447  | h                   | -4.688786 | 0.295624  | 2.610256  |
| N                    | 0.328193  | -2.668658 | 0.597990  | h                   | -0.913252 | 3.470716  | 4.260486  |
| N                    | -1.664113 | -0.896265 | 1.683286  | h                   | 1.901761  | 3.581890  | 4.019079  |
| N                    | 0.443614  | 0.916851  | 2.542900  | h                   | 5.506549  | 0.488860  | 1.615386  |
| N                    | 2.411005  | -0.860717 | 1.446974  | h                   | 5.462780  | -1.976574 | 0.494322  |
| C                    | 1.408268  | -3.383221 | 0.099309  |                     |           |           |           |
| C                    | 0.957112  | -4.591137 | -0.589293 | <sup>4</sup> IC(IV) |           |           |           |
| C                    | -0.418439 | -4.612755 | -0.477483 | S                   | 0.432311  | -1.711860 | 3.821556  |
| C                    | -0.796803 | -3.411834 | 0.258350  | O                   | 0.287355  | 0.009384  | -0.025424 |
| C                    | -2.526429 | -1.859265 | 1.192220  | Fe                  | 0.396571  | -0.833018 | 1.549469  |
| C                    | -3.916471 | -1.502334 | 1.469680  | N                   | 0.348505  | -2.647648 | 0.614471  |
| C                    | -3.891358 | -0.315630 | 2.187712  | N                   | -1.655371 | -0.867910 | 1.688646  |
| C                    | -2.464034 | 0.046233  | 2.298973  | N                   | 0.447820  | 0.901677  | 2.568933  |
| C                    | -0.632570 | 1.580151  | 3.089878  | N                   | 2.417797  | -0.854076 | 1.442796  |
| C                    | -0.199944 | 2.787946  | 3.798877  | C                   | 1.434806  | -3.373418 | 0.122528  |
| C                    | 1.171721  | 2.852422  | 3.668387  | C                   | 0.967578  | -4.571517 | -0.564290 |
| C                    | 1.552525  | 1.674911  | 2.864145  | C                   | -0.409956 | -4.576086 | -0.464287 |
| C                    | 3.260834  | 0.159184  | 1.826310  | C                   | -0.788713 | -3.374952 | 0.266348  |
| C                    | 4.642694  | -0.160575 | 1.473769  | C                   | -2.509340 | -1.830628 | 1.179169  |
| C                    | 4.620974  | -1.407539 | 0.888820  | C                   | -3.899846 | -1.470796 | 1.450525  |
| C                    | 3.219198  | -1.825133 | 0.854115  | C                   | -3.880858 | -0.294258 | 2.184879  |
| C                    | 2.740244  | -2.982634 | 0.252271  | C                   | -2.457977 | 0.073770  | 2.311980  |
| H                    | 3.497981  | -3.644028 | -0.154119 | C                   | -0.639182 | 1.575870  | 3.103041  |
| C                    | -2.104198 | -3.025692 | 0.550627  | C                   | -0.197188 | 2.781345  | 3.796231  |
| H                    | -2.881929 | -3.718704 | 0.244980  | C                   | 1.178597  | 2.836177  | 3.674894  |
| C                    | -1.954272 | 1.162863  | 2.969890  | C                   | 1.565274  | 1.658277  | 2.883971  |
| H                    | -2.683066 | 1.794182  | 3.464935  | C                   | 3.261403  | 0.173929  | 1.831423  |

|                         |           |           |           |                |           |           |           |
|-------------------------|-----------|-----------|-----------|----------------|-----------|-----------|-----------|
| C                       | 4.638774  | -0.144691 | 1.469103  | C              | -2.622051 | -1.803025 | 1.156158  |
| C                       | 4.620796  | -1.394553 | 0.888357  | C              | -4.013580 | -1.459131 | 1.450238  |
| C                       | 3.224664  | -1.820621 | 0.851372  | C              | -3.990339 | -0.305806 | 2.223957  |
| C                       | 2.763673  | -2.990555 | 0.266150  | C              | -2.565415 | 0.049484  | 2.353352  |
| H                       | 3.521126  | -3.652387 | -0.135441 | C              | -0.723337 | 1.588200  | 3.085485  |
| C                       | -2.097242 | -2.995163 | 0.539484  | C              | -0.264637 | 2.785914  | 3.787769  |
| H                       | -2.873036 | -3.684570 | 0.226578  | C              | 1.097271  | 2.872690  | 3.576778  |
| C                       | -1.962884 | 1.184712  | 2.984662  | C              | 1.447428  | 1.715603  | 2.731687  |
| H                       | -2.688450 | 1.823495  | 3.471966  | C              | 3.153131  | 0.177939  | 1.705807  |
| C                       | 2.860944  | 1.312122  | 2.515736  | C              | 4.539954  | -0.165703 | 1.398371  |
| H                       | 3.652573  | 1.990418  | 2.810944  | C              | 4.520963  | -1.429016 | 0.845461  |
| C                       | -1.274843 | 0.776771  | -2.986423 | C              | 3.117823  | -1.836694 | 0.791998  |
| H                       | -1.839418 | 1.393199  | -2.276891 | C              | 2.638764  | -3.015072 | 0.227632  |
| H                       | -1.773155 | 0.875130  | -3.969590 | H              | 3.395320  | -3.690041 | -0.157878 |
| H                       | -0.273889 | 1.212393  | -3.096889 | C              | -2.202850 | -2.943185 | 0.461409  |
| C                       | -1.199098 | -0.652628 | -2.544589 | H              | -2.991476 | -3.606725 | 0.121854  |
| H                       | -2.069220 | -1.087462 | -2.051281 | C              | -2.044665 | 1.153399  | 3.034338  |
| H                       | -0.285000 | -0.397415 | -0.723689 | H              | -2.757772 | 1.765147  | 3.574643  |
| C                       | -0.141114 | -1.578804 | -3.061101 | C              | 2.735325  | 1.348747  | 2.336752  |
| H                       | 0.852023  | -1.112378 | -3.014319 | H              | 3.528954  | 2.039445  | 2.601498  |
| H                       | -0.307640 | -1.843977 | -4.122605 | C              | -1.142785 | 1.125982  | -2.947632 |
| H                       | -0.106494 | -2.517040 | -2.498866 | H              | -1.751593 | 1.740250  | -2.271585 |
| h                       | 0.614874  | -3.078931 | 3.775343  | H              | -1.659792 | 1.126784  | -3.927807 |
| h                       | 1.600354  | -5.290415 | -1.084718 | H              | -0.181891 | 1.632381  | -3.109438 |
| h                       | -1.120970 | -5.303679 | -0.855610 | C              | -0.941415 | -0.260238 | -2.419350 |
| h                       | -4.733514 | -2.064658 | 1.075834  | H              | -1.779769 | -0.738502 | -1.920103 |
| h                       | -4.681640 | 0.304269  | 2.619137  | H              | -0.453542 | 0.812435  | -0.098083 |
| h                       | -0.908033 | 3.480164  | 4.237159  | C              | 0.136749  | -1.133944 | -2.967728 |
| h                       | 1.905782  | 3.568212  | 4.026166  | H              | 1.096735  | -0.603824 | -2.994015 |
| h                       | 5.499981  | 0.510211  | 1.601359  | H              | -0.077647 | -1.456004 | -4.005582 |
| h                       | 5.464837  | -1.962466 | 0.497031  | H              | 0.268652  | -2.034124 | -2.362308 |
|                         |           |           |           | h              | 0.639141  | -3.053428 | 3.817326  |
|                         |           |           |           | h              | 1.468536  | -5.319635 | -1.140404 |
|                         |           |           |           | h              | -1.258088 | -5.262271 | -1.005323 |
|                         |           |           |           | h              | -4.849567 | -2.043435 | 1.065815  |
|                         |           |           |           | h              | -4.785213 | 0.292440  | 2.669314  |
|                         |           |           |           | h              | -0.957712 | 3.452688  | 4.300727  |
|                         |           |           |           | h              | 1.835176  | 3.606494  | 3.900961  |
|                         |           |           |           | h              | 5.409697  | 0.471673  | 1.557632  |
|                         |           |           |           | h              | 5.365634  | -2.002135 | 0.463189  |
|                         |           |           |           |                |           |           |           |
|                         |           |           |           | <sup>4</sup> P |           |           |           |
|                         |           |           |           | S              | 0.423301  | -1.718371 | 3.969253  |
|                         |           |           |           | O              | -0.069970 | 0.454497  | -0.555465 |
| <sup>4</sup> TSreb(III) |           |           |           |                |           |           |           |
| S                       | 0.468622  | -1.685481 | 3.880485  |                |           |           |           |
| O                       | -0.009195 | -0.054256 | -0.235142 |                |           |           |           |
| Fe                      | 0.267252  | -0.827724 | 1.469665  |                |           |           |           |
| N                       | 0.235904  | -2.660771 | 0.555491  |                |           |           |           |
| N                       | -1.765635 | -0.865727 | 1.697839  |                |           |           |           |
| N                       | 0.326694  | 0.953448  | 2.447882  |                |           |           |           |
| N                       | 2.302860  | -0.848422 | 1.331711  |                |           |           |           |
| C                       | 1.304332  | -3.399821 | 0.073167  |                |           |           |           |
| C                       | 0.832856  | -4.589423 | -0.639637 |                |           |           |           |
| C                       | -0.543938 | -4.560276 | -0.574904 |                |           |           |           |
| C                       | -0.903082 | -3.354406 | 0.172622  |                |           |           |           |

|    |           |           |           |   |           |           |          |
|----|-----------|-----------|-----------|---|-----------|-----------|----------|
| Fe | 0.311158  | -0.908402 | 1.576830  | h | -4.764108 | 0.278914  | 2.605672 |
| N  | 0.258118  | -2.645317 | 0.535934  | h | -0.970173 | 3.448324  | 4.233460 |
| N  | -1.741639 | -0.857267 | 1.604914  | h | 1.834996  | 3.562077  | 3.938989 |
| N  | 0.346845  | 0.937249  | 2.422275  | h | 5.421375  | 0.474970  | 1.561937 |
| N  | 2.316561  | -0.841540 | 1.310033  | h | 5.381426  | -1.989898 | 0.454901 |
| C  | 1.342675  | -3.391145 | 0.063994  |   |           |           |          |
| C  | 0.873132  | -4.587279 | -0.623787 |   |           |           |          |
| C  | -0.505901 | -4.573565 | -0.548696 |   |           |           |          |
| C  | -0.881770 | -3.366345 | 0.172272  |   |           |           |          |
| C  | -2.601522 | -1.822497 | 1.102311  |   |           |           |          |
| C  | -3.987896 | -1.479150 | 1.403152  |   |           |           |          |
| C  | -3.966478 | -0.309446 | 2.152145  |   |           |           |          |
| C  | -2.546652 | 0.067839  | 2.259840  |   |           |           |          |
| C  | -0.725183 | 1.587290  | 3.022309  |   |           |           |          |
| C  | -0.271772 | 2.772303  | 3.740207  |   |           |           |          |
| C  | 1.101171  | 2.839161  | 3.582676  |   |           |           |          |
| C  | 1.470936  | 1.685772  | 2.750348  |   |           |           |          |
| C  | 3.167545  | 0.181458  | 1.711594  |   |           |           |          |
| C  | 4.550984  | -0.160894 | 1.400188  |   |           |           |          |
| C  | 4.533944  | -1.418178 | 0.833023  |   |           |           |          |
| C  | 3.134996  | -1.828898 | 0.767781  |   |           |           |          |
| C  | 2.674033  | -3.014956 | 0.213663  |   |           |           |          |
| H  | 3.432695  | -3.694698 | -0.155239 |   |           |           |          |
| C  | -2.188710 | -2.978717 | 0.443819  |   |           |           |          |
| H  | -2.967495 | -3.663114 | 0.127447  |   |           |           |          |
| C  | -2.047733 | 1.178222  | 2.935178  |   |           |           |          |
| H  | -2.767336 | 1.795638  | 3.458173  |   |           |           |          |
| C  | 2.765025  | 1.329990  | 2.378769  |   |           |           |          |
| H  | 3.558895  | 2.004347  | 2.677367  |   |           |           |          |
| C  | -1.394181 | 1.123816  | -2.531856 |   |           |           |          |
| H  | -2.067685 | 1.707101  | -1.891791 |   |           |           |          |
| H  | -1.980009 | 0.745197  | -3.379124 |   |           |           |          |
| H  | -0.621199 | 1.788987  | -2.932466 |   |           |           |          |
| C  | -0.764304 | -0.040521 | -1.764434 |   |           |           |          |
| H  | -1.549745 | -0.735143 | -1.436149 |   |           |           |          |
| H  | -0.624510 | 1.104839  | -0.074169 |   |           |           |          |
| C  | 0.281642  | -0.786736 | -2.582035 |   |           |           |          |
| H  | 1.072436  | -0.101997 | -2.907046 |   |           |           |          |
| H  | -0.182707 | -1.229961 | -3.471749 |   |           |           |          |
| H  | 0.739540  | -1.583653 | -1.992520 |   |           |           |          |
| h  | 0.613799  | -3.081209 | 3.865678  |   |           |           |          |
| h  | 1.508242  | -5.315173 | -1.128636 |   |           |           |          |
| h  | -1.213670 | -5.294958 | -0.957014 |   |           |           |          |
| h  | -4.824151 | -2.077158 | 1.041031  |   |           |           |          |

**Cartesian Coordinates of the Optimized  ${}^2\text{TS}_\text{H}(\text{IV})$  from QM calculation**

|                                                              |           |           |           |                                                                  |            |            |            |
|--------------------------------------------------------------|-----------|-----------|-----------|------------------------------------------------------------------|------------|------------|------------|
| B3LYP/LACVP optimized ${}^2\text{TS}_\text{H}(\text{IV})$ of |           |           |           | H                                                                | -1.241863  | -5.506498  | -0.639697  |
| methane hydroxylation by Cpd I by Gaussian                   |           |           |           | H                                                                | -4.765016  | -2.191501  | 1.432269   |
| 09                                                           |           |           |           | H                                                                | -4.644726  | 0.245320   | 2.603966   |
| S                                                            | 0.593609  | -1.970629 | 3.583028  | H                                                                | -0.754230  | 3.502916   | 4.015754   |
| O                                                            | 0.345481  | -0.130969 | -0.125165 | H                                                                | 1.945407   | 3.443803   | 3.818078   |
| Fe                                                           | 0.329135  | -0.947619 | 1.448593  | H                                                                | 5.454552   | 0.216675   | 1.608920   |
| N                                                            | 0.243101  | -2.777669 | 0.601309  | H                                                                | 5.318669   | -2.130315  | 0.265380   |
| N                                                            | -1.665901 | -0.941842 | 1.642255  |                                                                  |            |            |            |
| N                                                            | 0.430141  | 0.786736  | 2.465152  | B3LYP/def2-TZVP optimized ${}^2\text{TS}_\text{H}(\text{IV})$ of |            |            |            |
| N                                                            | 2.348114  | -0.974515 | 1.276424  | methane hydroxylation by Cpd I by                                |            |            |            |
| C                                                            | 1.305239  | -3.491070 | 0.061663  | Turbomole 6.3.1                                                  |            |            |            |
| C                                                            | 0.816603  | -4.722148 | -0.517956 | S                                                                | 0.6064202  | -1.9314321 | 3.5455039  |
| C                                                            | -0.537360 | -4.746277 | -0.335320 | O                                                                | 0.3676029  | -0.1542656 | -0.1194257 |
| C                                                            | -0.896113 | -3.526341 | 0.352212  | Fe                                                               | 0.3294983  | -0.9640566 | 1.4487307  |
| C                                                            | -2.543073 | -1.956231 | 1.272927  | N                                                                | 0.2481427  | -2.7892167 | 0.6004909  |
| C                                                            | -3.894686 | -1.578686 | 1.616647  | N                                                                | -1.6635724 | -0.9589570 | 1.6383437  |
| C                                                            | -3.834062 | -0.348084 | 2.206874  | N                                                                | 0.4330553  | 0.7804677  | 2.4527578  |
| C                                                            | -2.443682 | 0.043671  | 2.239757  | N                                                                | 2.3518764  | -0.9702843 | 1.2539589  |
| C                                                            | -0.630112 | 1.541774  | 2.935837  | C                                                                | 1.3032804  | -3.5019197 | 0.0981676  |
| C                                                            | -0.130911 | 2.745227  | 3.563879  | C                                                                | 0.8274925  | -4.7297210 | -0.4786253 |
| C                                                            | 1.230850  | 2.714611  | 3.465296  | C                                                                | -0.5206443 | -4.7412146 | -0.3290716 |
| C                                                            | 1.582573  | 1.494955  | 2.771515  | C                                                                | -0.8765669 | -3.5189257 | 0.3381106  |
| C                                                            | 3.225615  | -0.009587 | 1.735342  | C                                                                | -2.5264261 | -1.9511126 | 1.2530906  |
| C                                                            | 4.579815  | -0.370030 | 1.369374  | C                                                                | -3.8725636 | -1.5873853 | 1.5997065  |
| C                                                            | 4.511271  | -1.552740 | 0.691301  | C                                                                | -3.8105223 | -0.3797396 | 2.2134550  |
| C                                                            | 3.114581  | -1.933123 | 0.639219  | C                                                                | -2.4258755 | 0.0027841  | 2.2477967  |
| C                                                            | 2.634897  | -3.101321 | 0.069775  | C                                                                | -0.6159987 | 1.5101158  | 2.9337069  |
| H                                                            | 3.354672  | -3.767179 | -0.393315 | C                                                                | -0.1306252 | 2.7180694  | 3.5433051  |
| C                                                            | -2.192242 | -3.153804 | 0.673842  | C                                                                | 1.2194155  | 2.7088152  | 3.4140828  |
| H                                                            | -2.989798 | -3.847542 | 0.432015  | C                                                                | 1.5668331  | 1.4962874  | 2.7242513  |
| C                                                            | -1.970221 | 1.205150  | 2.825750  | C                                                                | 3.2117591  | -0.0049346 | 1.6873811  |
| H                                                            | -2.697954 | 1.887107  | 3.251154  | C                                                                | 4.5628744  | -0.3656475 | 1.3418184  |
| C                                                            | 2.876713  | 1.130618  | 2.439720  | C                                                                | 4.4997007  | -1.5592806 | 0.7040674  |
| H                                                            | 3.676760  | 1.796217  | 2.744383  | C                                                                | 3.1095071  | -1.9346511 | 0.6588057  |
| C                                                            | -1.757933 | 0.447187  | -1.407203 | C                                                                | 2.6309183  | -3.1143416 | 0.1194299  |
| H                                                            | -0.623910 | 0.110081  | -0.662313 | H                                                                | 3.3522018  | -3.7912502 | -0.3186731 |
| H                                                            | -1.297600 | 0.854525  | -2.305164 | C                                                                | -2.1716614 | -3.1391139 | 0.6435202  |
| H                                                            | -2.259904 | -0.510170 | -1.526605 | H                                                                | -2.9672641 | -3.8264621 | 0.3886028  |
| H                                                            | -2.264259 | 1.167290  | -0.768576 | C                                                                | -1.9505221 | 1.1560821  | 2.8418925  |
| H                                                            | 0.976865  | -3.223353 | 3.144674  | H                                                                | -2.6767625 | 1.8270883  | 3.2805923  |
| H                                                            | 1.441027  | -5.459723 | -1.000701 | C                                                                | 2.8566632  | 1.1404121  | 2.3752364  |

|   |            |            |            |   |           |           |           |
|---|------------|------------|------------|---|-----------|-----------|-----------|
| H | 3.6517960  | 1.8157383  | 2.6618355  | C | -1.116389 | -3.719662 | 0.286986  |
| C | -1.7156691 | 0.5060438  | -1.3288237 | H | -1.570443 | -4.618501 | -0.115101 |
| H | -0.6713123 | 0.1409290  | -0.6552292 | C | -2.690553 | 0.085354  | 2.873725  |
| H | -1.2780932 | 0.9656096  | -2.2100120 | H | -3.649033 | 0.384008  | 3.283808  |
| H | -2.2534533 | -0.4157160 | -1.5266807 | C | 1.774512  | 1.992947  | 2.817983  |
| H | -2.2392060 | 1.1980459  | -0.6771872 | H | 2.229194  | 2.902111  | 3.195823  |
| H | 0.7482032  | -3.2091417 | 3.1544389  | C | -1.117422 | -0.003917 | -2.868882 |
| H | 1.4583654  | -5.4732890 | -0.9401439 | H | -1.979457 | -0.512083 | -2.424628 |
| H | -1.2253051 | -5.4957316 | -0.6420183 | H | -1.139098 | -0.189934 | -3.954308 |
| H | -4.7407910 | -2.1965719 | 1.4020565  | H | -1.237617 | 1.074222  | -2.713718 |
| H | -4.6171663 | 0.2071358  | 2.6244150  | C | 0.188515  | -0.499304 | -2.273081 |
| H | -0.7567947 | 3.4668128  | 4.0028255  | H | 0.280847  | -1.590987 | -2.283103 |
| H | 1.9308005  | 3.4492870  | 3.7448462  | H | 0.090697  | -0.256773 | -1.045359 |
| H | 5.4332758  | 0.2292336  | 1.5707054  | C | 1.452041  | 0.211445  | -2.723929 |
| H | 5.3072462  | -2.1496889 | 0.3002147  | H | 1.368487  | 1.294516  | -2.578154 |

B3LYP/LACVP optimized  $^2\text{TS}_{\text{H}}(\text{IV})$  of  
*i*-propane hydroxylation by Cpd I by Gaussian  
 09

|    |           |           |           |
|----|-----------|-----------|-----------|
| S  | 0.676922  | -1.976153 | 3.609458  |
| O  | -0.065300 | 0.147813  | 0.152408  |
| Fe | 0.325706  | -0.859665 | 1.531120  |
| N  | 0.985505  | -2.440595 | 0.499436  |
| N  | -1.512101 | -1.674609 | 1.599791  |
| N  | -0.328211 | 0.729259  | 2.614694  |
| N  | 2.208126  | -0.131272 | 1.631709  |
| C  | 2.297801  | -2.698459 | 0.118826  |
| C  | 2.360069  | -3.954429 | -0.593497 |
| C  | 1.092733  | -4.462936 | -0.628973 |
| C  | 0.236524  | -3.527741 | 0.064778  |
| C  | -1.925064 | -2.856690 | 1.009733  |
| C  | -3.335738 | -3.058913 | 1.256101  |
| C  | -3.771385 | -1.993765 | 1.991581  |
| C  | -2.634259 | -1.124455 | 2.201433  |
| C  | -1.621269 | 0.946457  | 3.054175  |
| C  | -1.693208 | 2.217785  | 3.744952  |
| C  | -0.440771 | 2.759784  | 3.720251  |
| C  | 0.414112  | 1.824865  | 3.017400  |
| C  | 2.601464  | 1.081571  | 2.180428  |
| C  | 4.022574  | 1.264451  | 1.983709  |
| C  | 4.481458  | 0.169326  | 1.307888  |
| C  | 3.345590  | -0.695839 | 1.079169  |
| C  | 3.392717  | -1.892862 | 0.380748  |
| H  | 4.357833  | -2.221900 | 0.011600  |

|   |           |           |           |
|---|-----------|-----------|-----------|
| H | 2.329807  | -0.143244 | -2.173912 |
| H | 1.745765  | -1.221719 | 4.052242  |
| H | 3.265781  | -4.382616 | -0.997645 |
| H | 0.754892  | -5.391255 | -1.066108 |
| H | -3.902056 | -3.909543 | 0.905937  |
| H | -4.766787 | -1.796854 | 2.362029  |
| H | -2.591838 | 2.623927  | 4.185797  |
| H | -0.107192 | 3.698541  | 4.137846  |
| H | 4.579884  | 2.126121  | 2.321317  |
| H | 5.488921  | -0.044254 | 0.981789  |

B3LYP/def2-TZVP optimized  $^2\text{TS}_{\text{H}}(\text{IV})$  of  
*i*-propane hydroxylation by Cpd I by  
 Turbomole 6.3.1

|    |            |            |            |
|----|------------|------------|------------|
| S  | 0.6405462  | -1.9550598 | 3.5880764  |
| O  | -0.0459914 | 0.1522433  | 0.1830637  |
| Fe | 0.3412903  | -0.8564214 | 1.5528531  |
| N  | 0.9973755  | -2.4323056 | 0.5100329  |
| N  | -1.5069309 | -1.6580364 | 1.6040463  |
| N  | -0.3224211 | 0.7458361  | 2.6138292  |
| N  | 2.2205638  | -0.1350688 | 1.6579811  |
| C  | 2.2898798  | -2.6830444 | 0.1317924  |
| C  | 2.3548921  | -3.9278573 | -0.5832553 |
| C  | 1.0958887  | -4.4308155 | -0.6170476 |
| C  | 0.2530578  | -3.4983458 | 0.0799163  |
| C  | -1.9112602 | -2.8211613 | 1.0148910  |
| C  | -3.3197351 | -3.0132091 | 1.2299931  |
| C  | -3.7566273 | -1.9473632 | 1.9457830  |

|                                                                   |            |            |            |   |           |           |           |
|-------------------------------------------------------------------|------------|------------|------------|---|-----------|-----------|-----------|
| C                                                                 | -2.6188750 | -1.0975088 | 2.1701986  | N | -1.752846 | -1.093377 | 1.527318  |
| C                                                                 | -1.6024923 | 0.9686303  | 3.0276773  | N | 0.348646  | 0.727571  | 2.085049  |
| C                                                                 | -1.6758944 | 2.2275482  | 3.7239391  | N | 2.269999  | -1.259893 | 1.334741  |
| C                                                                 | -0.4256804 | 2.7498671  | 3.7244004  | C | 1.213920  | -3.942230 | 0.568743  |
| C                                                                 | 0.4188212  | 1.8112413  | 3.0305804  | C | 0.718541  | -5.252721 | 0.210278  |
| C                                                                 | 2.6086475  | 1.0523848  | 2.2160708  | C | -0.641365 | -5.220368 | 0.339326  |
| C                                                                 | 4.0233158  | 1.2344534  | 2.0336265  | C | -0.996143 | -3.887132 | 0.771880  |
| C                                                                 | 4.4765062  | 0.1534221  | 1.3513944  | C | -2.638373 | -2.145424 | 1.317785  |
| C                                                                 | 3.3401988  | -0.6937414 | 1.1110938  | C | -3.993303 | -1.689274 | 1.528372  |
| C                                                                 | 3.3822086  | -1.8818934 | 0.4033415  | C | -3.927216 | -0.370668 | 1.878842  |
| H                                                                 | 4.3448107  | -2.2096659 | 0.0341945  | C | -2.530211 | -0.000860 | 1.894451  |
| C                                                                 | -1.0985317 | -3.6833017 | 0.3004161  | C | -0.709777 | 1.575137  | 2.362434  |
| H                                                                 | -1.5526867 | -4.5767162 | -0.1066238 | C | -0.205731 | 2.866667  | 2.774575  |
| C                                                                 | -2.6721796 | 0.1154180  | 2.8322022  | C | 1.157665  | 2.794731  | 2.741762  |
| H                                                                 | -3.6324536 | 0.4239963  | 3.2234016  | C | 1.505689  | 1.460508  | 2.304033  |
| C                                                                 | 1.7814567  | 1.9614338  | 2.8509922  | C | 3.151615  | -0.240799 | 1.643635  |
| H                                                                 | 2.2396311  | 2.8603744  | 3.2414253  | C | 4.510283  | -0.685707 | 1.410337  |
| C                                                                 | -1.1443084 | -0.1319134 | -2.8293765 | C | 4.439908  | -1.972863 | 0.961324  |
| H                                                                 | -1.9516924 | -0.7047628 | -2.3705746 | C | 3.037433  | -2.333350 | 0.920435  |
| H                                                                 | -1.1728045 | -0.3198160 | -3.9096405 | C | 2.551410  | -3.579457 | 0.559458  |
| H                                                                 | -1.3494876 | 0.9294031  | -2.6728922 | H | 3.272121  | -4.332319 | 0.259787  |
| C                                                                 | 0.2039759  | -0.5167719 | -2.2621457 | C | -2.293898 | -3.439091 | 0.966459  |
| H                                                                 | 0.3794857  | -1.5939704 | -2.2997504 | H | -3.098420 | -4.152605 | 0.826638  |
| H                                                                 | 0.1324002  | -0.2935622 | -1.0727157 | C | -2.052483 | 1.244462  | 2.265845  |
| C                                                                 | 1.3841084  | 0.2791718  | -2.7734525 | H | -2.779416 | 2.006092  | 2.525043  |
| H                                                                 | 1.2388279  | 1.3494216  | -2.6099517 | C | 2.802538  | 1.017839  | 2.104533  |
| H                                                                 | 1.5118963  | 0.1232296  | -3.8516821 | H | 3.606015  | 1.715340  | 2.314051  |
| H                                                                 | 2.3123107  | -0.0175584 | -2.2830360 | C | -1.627414 | -0.177849 | -1.730285 |
| H                                                                 | 1.8012834  | -1.3855108 | 3.9532175  | H | -0.634049 | -0.462312 | -0.909518 |
| H                                                                 | 3.2590052  | -4.3528516 | -0.9906063 | H | -2.166709 | -1.126929 | -1.766127 |
| H                                                                 | 0.7530327  | -5.3542621 | -1.0571761 | H | -2.166175 | 0.592882  | -1.175256 |
| H                                                                 | -3.8853377 | -3.8579951 | 0.8689731  | C | -0.972030 | 0.263502  | -3.016101 |
| H                                                                 | -4.7556626 | -1.7356331 | 2.2936480  | H | -1.733451 | 0.522931  | -3.769425 |
| H                                                                 | -2.5762147 | 2.6385091  | 4.1533404  | H | -0.346225 | -0.528888 | -3.439903 |
| H                                                                 | -0.0852262 | 3.6788016  | 4.1545399  | H | -0.345437 | 1.148447  | -2.863144 |
| H                                                                 | 4.5800146  | 2.0895310  | 2.3841638  | H | 0.863606  | -3.072256 | 3.532338  |
| H                                                                 | 5.4817717  | -0.0633615 | 1.0253884  | H | 1.343122  | -6.077831 | -0.099789 |
|                                                                   |            |            |            | H | -1.351705 | -6.013030 | 0.154825  |
| B3LYP/LACVP optimized <sup>2</sup> TS <sub>H</sub> (IV) of ethane |            |            |            | H | -4.869720 | -2.312526 | 1.426191  |
| hydroxylation by Cpd I by Gaussian 09                             |            |            |            | H | -4.738695 | 0.299303  | 2.123074  |
| S                                                                 | 0.411077   | -1.779505  | 3.709886   | H | -0.827188 | 3.705911  | 3.050904  |
| O                                                                 | 0.353771   | -0.680421  | -0.277057  | H | 1.875798  | 3.564671  | 2.983189  |
| Fe                                                                | 0.244823   | -1.167804  | 1.414252   | H | 5.388792  | -0.079137 | 1.575057  |
| N                                                                 | 0.149752   | -3.123801  | 0.921352   | H | 5.249530  | -2.632936 | 0.686122  |
